# Supplementary material for: Optimization of ultrasonic-assisted debittering of Ganoderma lucidum using response surface methodology, characterization, and evaluation of antioxidant activity
Source: PeerJ. 2024 Oct 14;12:e17943. doi: 10.7717/peerj.17943 (PMC11485051; doi:10.7717/peerj.17943)
Supplement: Supplemental Information 1 [file peerj-12-17943-s001.xlsx]

## Sheet: Sheet1
1、Single factor experiment results
2-HP-β-CD Concentration	Bitterness value		Ultrasonic power	Bitterness value		Ultrasonic time	Bitterness value		Ultrasonic temperature	Bitterness value		Host-guest ratio	Bitterness value
6	2.21		40	2.13		5	2.21		20	1.78		0.5:1	2.77
6	2.28		40	1.92		5	2.13		20	1.88		0.5:1	2.67
6	2.08		40	1.98		5	2.09		20	1.83		0.5:1	2.81
8	2.03		55	1.96		15	2.16		30	1.67		01:01:00	2.08
8	1.98		55	2.05		15	2.08		30	1.82		01:01:00	1.88
8	2.02		55	1.92		15	2.21		30	1.94		01:01:00	1.9
10	2.03		70	1.98		25	2.09		40	1.85		1.5:1	1.69
10	1.87		70	2.16		25	2.19		40	2.01		1.5:1	1.51
10	1.95		70	2.05		25	1.98		40	1.86		1.5:1	1.45
12	1.87		85	2.21		35	2.15		50	2.14		02:01:00	1.63
12	1.73		85	2.12		35	1.96		50	2.27		02:01:00	1.4
12	1.75		85	2.02		35	2.07		50	2.19		02:01:00	1.32
14	1.88		100	2.17		45	2.15		60	2.2		2.5:1	1.47
14	1.82		100	2.06		45	2.09		60	2.29		2.5:1	1.52
14	1.76		100	2.17		45	2.22		60	2.35		2.5:1	1.38
2、Response surface optimization results
number	2-HP-β-CD Concentration	Host-guest ratio	Ultrasonic temperature	Bitterness value	Bitterness value	Bitterness value		number	2-HP-β-CD Concentration	Host-guest ratio	Ultrasonic temperature	Bitterness value	Bitterness value	Bitterness value
1	12	1.5:1	30	2.01	1.77	1.32		10	12	02:01:00	40	1.72	1.66	1.54
1	12	1.5:1	30	1.42	1.58	1.58		10	12	02:01:00	40	1.28	1.92	1.72
1	12	1.5:1	30	1.36	1.84	1.86		10	12	02:01:00	40	1.53	1.26	1.45
2	14	1.5:1	40	1.57	1.99	1.79		11	12	1.5:1	30	1.85	1.83	1.54
2	14	1.5:1	40	1.82	1.38	1.29		11	12	1.5:1	30	1.68	1.77	1.89
2	14	1.5:1	40	1.91	1.36	1.17		11	12	1.5:1	30	1.41	1.74	2.07
3	12	1.5:1	30	1.89	1.67	1.83		12	14	1.5:1	20	1.89	1.33	2.08
3	12	1.5:1	30	1.81	1.79	1.48		12	14	1.5:1	20	1.26	1.86	1.98
3	12	1.5:1	30	1.81	1.77	1.19		12	14	1.5:1	20	1.24	1.51	1.42
4	12	01:01:00	40	1.89	1.96	1.66		13	14	01:01:00	30	1.82	2.57	1.71
4	12	01:01:00	40	1.95	2.02	1.74		13	14	01:01:00	30	1.46	1.74	1.91
4	12	01:01:00	40	2.28	2.25	1.95		13	14	01:01:00	30	1.67	2.03	1.41
5	10	1.5:1	20	1.65	2.25	2.62		14	12	01:01:00	20	1.42	1.83	1.81
5	10	1.5:1	20	1.42	2.07	1.86		14	12	01:01:00	20	2.82	2.17	1.75
5	10	1.5:1	20	2.89	2.6	2.67		14	12	01:01:00	20	1.87	2.01	1.34
6	10	1.5:1	40	2.57	2.48	2.74		15	10	01:01:00	30	2.08	2.13	2.46
6	10	1.5:1	40	2.18	2.37	2.45		15	10	01:01:00	30	2.76	2.92	2.81
6	10	1.5:1	40	1.62	1.5	2.03		15	10	01:01:00	30	2.95	3.05	2.5
7	10	02:01:00	30	1.73	1.97	2.17		16	12	1.5:1	30	1.51	1.74	1.85
7	10	02:01:00	30	1.96	1.39	2.27		16	12	1.5:1	30	1.25	1.28	1.7
7	10	02:01:00	30	2.14	2.25	2.17		16	12	1.5:1	30	1.64	1.91	1.51
8	12	1.5:1	30	1.82	1.43	1.52		17	12	02:01:00	20	1.83	1.26	1.64
8	12	1.5:1	30	1.64	1.87	1.64		17	12	02:01:00	20	1.28	1.65	1.25
8	12	1.5:1	30	2.25	1.82	1.55		17	12	02:01:00	20	1.82	1.27	1.62
9	14	02:01:00	30	1.47	1.42	1.58
9	14	02:01:00	30	1.62	1.69	1.42
9	14	02:01:00	30	1.36	1.94	1.74
3、Electronic tongue test results
Experimental group	Umami		Richness		Sourness		Bitterness		Astringency		Aftertaste-B		Saltiness
G. lucidum decoction	0.48		2.1		-4.86		7.22		-3.15		4.81		-4.89
G. lucidum decoction	0.25		1.59		-4.68		7.15		-3.3		4.75		-4.99
G. lucidum decoction	0.51		1.87		-4.94		7.58		-3.19		4.79		-5.01
diluent for the decoction of G. lucidum	-0.87		1.56		-7.59		5.58		-4.88		2.56		-7.11
diluent for the decoction of G. lucidum	-1.73		1.25		-7.46		5.39		-5.74		2.5		-7.13
diluent for the decoction of G. lucidum	-1.11		1.31		-7.57		5.78		-4.92		2.11		-7.14
diluent for the decoction of G. lucidum	-1.43		1.65		-6.7		5.42		-5.13		2.09		-7.37
diluent for the decoction of G. lucidum	-0.23		1.27		-6.75		5.42		-5.81		2.11		-7.27
diluent for the decoction of G. lucidum	0.86		1.54		-6.7		5.59		-5.25		1.84		-7.37
diluent for the decoction of G. lucidum	0.8		1.7		-6.71		4.89		-6.22		1.84		-7.1
diluent for the decoction of G. lucidum	0.8		1.25		-6.71		5.16		-6		1.51		-7
diluent for the decoction of G. lucidum	1.6		1.66		-6.77		4.84		-5.46		1.8		-7.09
inclusion liquid	-0.41		1.91		-6.8		1.34		-6.12		0.6		-6.68
inclusion liquid	-0.56		1.55		-6.77		1.04		-5.26		0.55		-6.61
inclusion liquid	-0.25		1.77		-6.89		1.28		-5.82		1.06		-6.69
inclusion liquid	-0.27		1.94		-5.3		1.08		-6.04		0.78		-6.72
inclusion liquid	0.48		1.56		-5.23		1.81		-5.12		0.45		-6.66
inclusion liquid	0.11		1.9		-5.22		2.01		-3.04		0.89		-6.75
inclusion liquid	-0.21		1.96		-7.02		1.4		-6.64		0.48		-7.79
inclusion liquid	-0.78		1.63		-6.16		1.28		-6.34		0.37		-6.8
inclusion liquid	0.27		1.77		-5.41		1.46		-5.13		1.16		-6.72
4、Physical characteristics
Experimental group	Moisture content (%)	Bulk Density (g/mL)	Solubility (%)	Hygroscopicity (g/100g)
FDP	8.35	0.114	95.7	8
FDP	7.68	0.116	96.43	8
FDP	9.17	0.114	94.97	9
SDP	2.78	0.267	97.75	6
SDP	3	0.26	95.7	7
SDP	2.95	0.264	95.33	7
GLP	6.69	0.2	94.57	48
GLP	6.73	0.19	94.32	45
GLP	6.48	0.194	95.88	47
5、Antioxidant activity
Experimental group	Ferric reducing antioxidant power	hydroxyl radical antioxidant activity	DPPH antioxidant activity
G. lucidum decoction	0.116	49.09	67.08
G. lucidum decoction	0.114	43.83	62.58
G. lucidum decoction	0.114	46.03	60.74
diluent for the decoction of G. lucidum	0.069	26.99	39.88
diluent for the decoction of G. lucidum	0.078	31.96	47.03
diluent for the decoction of G. lucidum	0.074	34.35	44.81
inclusion liquid	0.087	41.15	63.8
inclusion liquid	0.092	47.46	69.33
inclusion liquid	0.089	42.58	61.15
6、Ferric reducing antioxidant power						hydroxyl radical antioxidant activity						DPPH antioxidant activity
concentration	FDP	SDP	GLP	α-Trolox		concentration	FDP	SDP	GLP	α-Trolox		concentration	FDP	SDP	GLP	α-Trolox
10	0.8	0.78	1.68	2.19		10	60.37	63.5	61.99	67.12		5	51.12	50.92	63.34	93.48
10	0.79	0.73	1.54	2.22		10	60.8	62.1	64.8	62.96		5	54.58	53.36	60.08	93.89
10	0.68	0.72	1.61	2.1		10	62.42	63.18	61.12	65.45		5	52.75	52.14	58.86	94.09
20	1.27	0.97	2.13	2.75		20	66.32	65.04	67.29	82.01		10	63.95	71.69	74.13	94.7
20	1.32	1.01	2.22	3.12		20	65.99	63.5	68.59	78.98		10	68.02	69.86	72.91	95.52
20	1.25	1.02	2.07	2.92		20	66.64	64.15	66.75	79.95		10	65.58	71.08	77.39	95.52
30	1.9	1.44	2.68	3.52		30	71.19	70.11	71.62	85.47		15	85.34	82.48	81.87	93.69
30	1.95	1.47	2.96	2.94		30	70.54	69.67	70.32	83.63		15	86.35	84.11	84.11	95.11
30	2	1.55	2.89	3.26		30	69.78	70.54	72.81	84.91		15	82.08	86.56	84.93	95.32
40	2.26	1.82	3.28	3.57		40	72.27	69.78	78.98	89.37		20	91.65	92.46	89.21	94.09
40	2.13	1.85	3.39	3.79		40	73.14	71.95	77.57	88.94		20	93.28	92.87	92.06	94.7
40	2.17	1.86	3.33	3.54		40	71.51	70.54	76.6	89.15		20	94.09	90.84	92.87	95.11
50	2.51	2.23	4.39	4.17		50	72.92	71.84	79.95	90.68		25	94.09	94.3	93.48	95.32
50	2.66	2.35	4.58	4.23		50	74.76	73.03	77.25	91.43		25	95.32	94.09	95.52	94.91
50	2.56	2.48	4.31	4.28		50	74.87	73.79	81.47	89.15		25	96.13	95.58	96.33	95.11
7、Infrared spectral data						8、Nuclear magnetic resonance data
Wavenumber	HP-β-CD	GLP	FD-IC	SD-IC
399.675	0	0	0	0		HP-β-CD	1H NMR (600 MHz, DMSO-d6) δ 5.74 (d, J = 6.8 Hz, 1H), 5.69 (d, J = 2.5 Hz, 1H), 5.52 – 5.39 (m, 1H), 4.96 (d, J = 50.6 Hz, 1H), 4.82 (d, J = 3.7 Hz, 1H), 4.48 (t, J = 5.7 Hz, 1H), 3.69 – 3.52 (m, 6H), 3.41 (s, 4H), 3.32 (dt, J = 29.0, 9.4 Hz, 3H).
400.157	85.0616	99.407	78.377	82.0345
400.639	84.9553	99.3064	78.2594	81.8754		GLP	1H NMR (600 MHz, DMSO-d6) δ 4.57 (d, J = 145.7 Hz, 1H), 3.02 (d, J = 413.3 Hz, 6H), 2.54 – 1.26 (m, 5H), 1.26 – -0.97 (m, 6H).
401.121	84.8767	99.2066	78.1846	81.7312
401.603	84.859	99.1471	78.2167	81.593		FDP	1H NMR (600 MHz, DMSO-d6) δ 5.75 (d, J = 6.7 Hz, 1H), 5.69 (s, 1H), 4.83 (d, J = 3.6 Hz, 1H), 4.47 (t, J = 5.7 Hz, 1H), 3.70 – 3.50 (m, 5H), 3.34 (s, 14H), 2.52 – 2.48 (m, 5H).
402.085	84.8151	99.1586	78.2295	81.3975
402.567	84.7284	99.2221	78.1816	81.1582		SDP	1H NMR (600 MHz, DMSO-d6) δ 5.75 (d, J = 6.7 Hz, 1H), 5.70 (s, 1H), 4.96 (d, J = 57.3 Hz, 1H), 4.83 (d, J = 3.6 Hz, 1H), 4.48 (t, J = 5.6 Hz, 1H), 3.69 – 3.54 (m, 5H), 3.37 (s, 10H), 2.51 (p, J = 1.9 Hz, 2H).
403.05	84.6399	99.2772	78.1077	80.9461
403.532	84.5872	99.2807	78.0543	80.8105
404.014	84.5545	99.2443	78.0061	80.7311
404.496	84.5107	99.2082	77.9151	80.6636
404.978	84.4624	99.1975	77.7856	80.5975
405.46	84.4185	99.2084	77.6658	80.529
405.942	84.386	99.2144	77.6051	80.4706
406.424	84.3491	99.1903	77.563	80.4115
406.906	84.3041	99.1343	77.5233	80.3592
407.389	84.2555	99.0384	77.4865	80.3146
407.871	84.2108	98.898	77.4564	80.2806
408.353	84.171	98.7183	77.4311	80.2487
408.835	84.1413	98.5123	77.4135	80.2162
409.317	84.1226	98.2976	77.4038	80.1786
409.799	84.1127	98.0909	77.4008	80.1316
410.281	84.1097	97.9039	77.4046	80.0754
410.763	84.115	97.7417	77.4172	80.016
411.245	84.1328	97.6032	77.4418	79.9628
411.728	84.1664	97.4836	77.4791	79.9241
412.21	84.2163	97.3763	77.5247	79.9025
412.692	84.2757	97.2774	77.5681	79.8936
413.174	84.3415	97.1861	77.5992	79.8945
413.656	84.4066	97.104	77.6067	79.8977
414.138	84.4634	97.0348	77.5853	79.8964
414.62	84.508	96.9828	77.5386	79.8871
415.103	84.5391	96.9509	77.4775	79.8699
415.585	84.5562	96.9395	77.416	79.8457
416.067	84.5559	96.9444	77.3651	79.8125
416.549	84.5419	96.9583	77.3357	79.775
417.031	84.5107	96.9716	77.3259	79.7324
417.513	84.4591	96.972	77.3278	79.6825
417.995	84.3836	96.9492	77.3285	79.6216
418.477	84.2853	96.8937	77.3199	79.5498
418.959	84.1685	96.8024	77.2973	79.468
419.442	84.0391	96.6785	77.2617	79.3787
419.924	83.9007	96.5344	77.2147	79.2802
420.406	83.7614	96.3839	77.1655	79.1777
420.888	83.6208	96.24	77.1152	79.069
421.37	83.4765	96.1116	77.063	78.9525
421.852	83.3281	96.0022	77.0075	78.8306
422.334	83.1777	95.9095	76.9473	78.7086
422.816	83.0285	95.8281	76.8806	78.5924
423.298	82.8831	95.751	76.8061	78.4856
423.781	82.742	95.6736	76.7215	78.3876
424.263	82.6031	95.596	76.625	78.2947
424.745	82.4657	95.5198	76.5149	78.2011
425.227	82.3255	95.4492	76.3897	78.0998
425.709	82.1794	95.3889	76.2503	77.9849
426.191	82.0295	95.3417	76.1014	77.856
426.673	81.8808	95.3077	75.9497	77.7167
427.155	81.7383	95.2848	75.8009	77.5703
427.637	81.6039	95.2692	75.6582	77.4179
428.12	81.4837	95.2572	75.5254	77.265
428.602	81.3767	95.2441	75.4004	77.1126
429.084	81.2769	95.2256	75.2779	76.9569
429.566	81.1809	95.1975	75.154	76.7977
430.048	81.0879	95.1555	75.0294	76.6378
430.53	81	95.0999	74.9059	76.4828
431.012	80.9205	95.0329	74.7875	76.3377
431.494	80.8461	94.9574	74.6752	76.2002
431.977	80.7782	94.8777	74.5724	76.0729
432.459	80.7137	94.7971	74.4779	75.9532
432.941	80.6506	94.7178	74.3919	75.8427
433.423	80.5868	94.6397	74.3136	75.7411
433.905	80.5221	94.5614	74.2436	75.6492
434.387	80.4584	94.4818	74.1834	75.5683
434.869	80.399	94.4002	74.1357	75.4985
435.351	80.3453	94.3169	74.1005	75.4363
435.834	80.2976	94.2334	74.0761	75.3768
436.316	80.2556	94.1503	74.0574	75.3157
436.798	80.2194	94.0676	74.0404	75.252
437.28	80.1877	93.9837	74.0204	75.1855
437.762	80.1622	93.8963	73.9958	75.1213
438.244	80.1447	93.8033	73.9668	75.0653
438.726	80.1382	93.7058	73.9366	75.0255
439.208	80.1458	93.6025	73.9097	75.0047
439.69	80.1626	93.4963	73.8847	74.9994
440.173	80.1856	93.3904	73.8603	75.0055
440.655	80.2103	93.2865	73.8351	75.0191
441.137	80.2335	93.1854	73.8076	75.0383
441.619	80.2548	93.0872	73.7778	75.0635
442.101	80.2758	92.9916	73.7475	75.0982
442.583	80.2951	92.8972	73.7165	75.1407
443.065	80.3139	92.8029	73.6882	75.191
443.547	80.3377	92.7087	73.6661	75.2541
444.029	80.3605	92.613	73.6465	75.321
444.512	80.3813	92.5132	73.6295	75.3889
444.994	80.398	92.407	73.6138	75.4533
445.476	80.4122	92.2907	73.6005	75.5132
445.958	80.4272	92.1629	73.5923	75.57
446.44	80.4467	92.0231	73.5933	75.6252
446.922	80.4727	91.8727	73.6058	75.679
447.404	80.5059	91.7156	73.63	75.7307
447.886	80.5451	91.5535	73.6647	75.7786
448.368	80.588	91.3879	73.708	75.8212
448.851	80.6345	91.2198	73.758	75.8611
449.333	80.6861	91.0497	73.8143	75.9026
449.815	80.7443	90.8786	73.8776	75.9494
450.297	80.8127	90.7083	73.9508	76.0064
450.779	80.892	90.5392	74.0346	76.0723
451.261	80.9762	90.3763	74.1238	76.1415
451.743	81.0664	90.2214	74.2176	76.2137
452.226	81.1587	90.0746	74.3113	76.2858
452.708	81.2483	89.9345	74.3979	76.3531
453.19	81.3377	89.7986	74.4748	76.4203
453.672	81.428	89.662	74.5401	76.4897
454.154	81.5168	89.5228	74.593	76.5608
454.636	81.6088	89.3789	74.6371	76.6388
455.118	81.6995	89.2304	74.6705	76.7198
455.6	81.7818	89.0777	74.6907	76.7958
456.082	81.8536	88.9206	74.6989	76.8652
456.565	81.9119	88.7597	74.6946	76.925
457.047	81.9565	88.5929	74.6786	76.9741
457.529	81.9884	88.4203	74.654	77.0132
458.011	82.0088	88.2427	74.6239	77.0425
458.493	82.0178	88.063	74.5903	77.0605
458.975	82.0139	87.8843	74.5546	77.0646
459.457	81.9945	87.7095	74.5172	77.052
459.939	81.9578	87.5404	74.4788	77.0226
460.421	81.904	87.378	74.4402	76.9794
460.904	81.8352	87.222	74.4026	76.9275
461.386	81.7535	87.0712	74.3665	76.8703
461.868	81.6626	86.9244	74.3324	76.8123
462.35	81.5644	86.781	74.2989	76.7541
462.832	81.4586	86.64	74.2614	76.6928
463.314	81.3432	86.5007	74.2143	76.6239
463.796	81.2166	86.3621	74.1526	76.5443
464.278	81.0774	86.2219	74.0723	76.451
464.76	80.9301	86.0788	73.9749	76.349
465.243	80.7774	85.9309	73.8622	76.2387
465.725	80.6209	85.7809	73.7398	76.1238
466.207	80.4646	85.6287	73.6109	76.0052
466.689	80.3048	85.4766	73.4757	75.8772
467.171	80.1414	85.3261	73.3356	75.7385
467.653	79.9728	85.1762	73.1893	75.5857
468.135	79.7979	85.0258	73.0353	75.4181
468.617	79.6175	84.8726	72.8738	75.2388
469.099	79.4344	84.7149	72.7065	75.0514
469.582	79.2503	84.5534	72.5372	74.8617
470.064	79.0634	84.3893	72.3653	74.6685
470.546	78.8763	84.2241	72.1958	74.4764
471.028	78.688	84.0588	72.0281	74.2832
471.51	78.4975	83.8939	71.8628	74.0887
471.992	78.3057	83.7278	71.6984	73.8924
472.474	78.1133	83.5586	71.5359	73.6966
472.957	77.9223	83.3839	71.375	73.5026
473.439	77.7368	83.2033	71.2173	73.3139
473.921	77.5562	83.017	71.0628	73.1282
474.403	77.379	82.826	70.9107	72.9419
474.885	77.2061	82.6327	70.7617	72.7551
475.367	77.0384	82.4392	70.6168	72.5682
475.849	76.8747	82.2463	70.4758	72.3794
476.331	76.7193	82.0549	70.3419	72.1932
476.813	76.5767	81.8656	70.2186	72.0146
477.296	76.4484	81.6793	70.1091	71.8467
477.778	76.3353	81.4969	70.0126	71.6879
478.26	76.2331	81.3188	69.9277	71.5349
478.742	76.143	81.1449	69.8557	71.3909
479.224	76.0612	80.9735	69.7916	71.2527
479.706	75.9853	80.8038	69.7329	71.1227
480.188	75.9156	80.633	69.6777	71.0031
480.67	75.8545	80.4575	69.6284	70.9004
481.152	75.8017	80.2766	69.5845	70.816
481.635	75.7567	80.0903	69.5433	70.7455
482.117	75.7222	79.8976	69.508	70.6904
482.599	75.6939	79.6985	69.4742	70.6425
483.081	75.6692	79.4932	69.4407	70.5986
483.563	75.6456	79.2805	69.4059	70.555
484.045	75.6225	79.06	69.3704	70.5129
484.527	75.6017	78.8311	69.3345	70.4731
485.009	75.5846	78.5949	69.3002	70.4365
485.491	75.5705	78.3522	69.2684	70.4009
485.974	75.5574	78.1045	69.2384	70.3627
486.456	75.5469	77.8538	69.2119	70.322
486.938	75.5364	77.6008	69.1853	70.2723
487.42	75.5239	77.346	69.1582	70.2133
487.902	75.5133	77.0882	69.1305	70.1479
488.384	75.5054	76.8272	69.1044	70.081
488.866	75.4985	76.5636	69.0782	70.0118
489.348	75.491	76.2986	69.051	69.9403
489.831	75.4798	76.0319	69.0221	69.8662
490.313	75.4647	75.7633	68.9919	69.7919
490.795	75.4416	75.4917	68.9565	69.7141
491.277	75.4083	75.2165	68.9147	69.6331
491.759	75.3676	74.9349	68.8666	69.5524
492.241	75.3215	74.6455	68.8143	69.4758
492.723	75.2681	74.349	68.7543	69.3986
493.205	75.2128	74.0482	68.6895	69.3235
493.688	75.1539	73.7433	68.6209	69.2477
494.17	75.0857	73.4369	68.5457	69.1643
494.652	75.0084	73.1306	68.4663	69.0749
495.134	74.9223	72.8251	68.383	68.9789
495.616	74.8304	72.52	68.2985	68.8816
496.098	74.7357	72.2148	68.2152	68.7865
496.58	74.641	71.9105	68.1338	68.696
497.062	74.5481	71.6066	68.0552	68.6106
497.544	74.4554	71.3028	67.9776	68.5266
498.027	74.3635	70.9993	67.8995	68.4411
498.509	74.27	70.6955	67.8176	68.3505
498.991	74.1735	70.3907	67.7319	68.255
499.473	74.0763	70.0848	67.6419	68.1551
499.955	73.9802	69.78	67.55	68.0562
500.437	73.8866	69.477	67.456	67.9573
500.919	73.7951	69.1767	67.3618	67.8587
501.401	73.7046	68.8795	67.2672	67.7584
501.884	73.6121	68.5858	67.1716	67.6534
502.366	73.5152	68.2954	67.0731	67.5403
502.848	73.4129	68.0082	66.9706	67.4183
503.33	73.3082	67.7242	66.864	67.2893
503.812	73.2024	67.4428	66.7555	67.1565
504.294	73.094	67.1653	66.6444	67.0176
504.776	72.9892	66.8935	66.5343	66.878
505.258	72.8804	66.6294	66.4228	66.7319
505.74	72.7665	66.3734	66.3095	66.5798
506.223	72.6489	66.1259	66.1959	66.4257
506.705	72.5259	65.886	66.0796	66.2697
507.187	72.3989	65.6524	65.9612	66.1167
507.669	72.27	65.4249	65.8405	65.9705
508.151	72.1414	65.2032	65.7176	65.8324
508.633	72.014	64.9867	65.5935	65.7009
509.115	71.8863	64.7755	65.4673	65.5701
509.597	71.757	64.571	65.3383	65.435
510.079	71.6252	64.3736	65.2073	65.2927
510.562	71.4919	64.1855	65.0742	65.1419
511.044	71.36	64.007	64.9416	64.9874
511.526	71.2302	63.839	64.8103	64.8314
512.008	71.1044	63.6808	64.6827	64.6778
512.49	70.9741	63.5348	64.5535	64.5213
512.972	70.8455	63.3983	64.4279	64.3668
513.454	70.7137	63.2721	64.3026	64.2094
513.936	70.5756	63.156	64.1742	64.0454
514.418	70.4299	63.0492	64.0409	63.8739
514.901	70.2774	62.9509	63.902	63.6962
515.383	70.1196	62.8595	63.7582	63.5153
515.865	69.9562	62.7754	63.6075	63.3304
516.347	69.7898	62.6984	63.451	63.1447
516.829	69.6145	62.6286	63.2859	62.953
517.311	69.4301	62.5646	63.1112	62.7552
517.793	69.234	62.5049	62.9273	62.5514
518.275	69.0234	62.4484	62.7327	62.3398
518.758	68.8004	62.3948	62.5285	62.1237
519.24	68.5684	62.3434	62.3174	61.907
519.722	68.3291	62.2935	62.1009	61.6899
520.204	68.0862	62.245	61.8814	61.4739
520.686	67.8391	62.1978	61.659	61.2563
521.168	67.5862	62.1524	61.4319	61.0328
521.65	67.3258	62.1082	61.1994	60.8014
522.132	67.062	62.0647	60.9639	60.5677
522.615	66.7973	62.022	60.7274	60.3362
523.097	66.534	61.9807	60.4915	60.1103
523.579	66.2772	61.9416	60.2603	59.8968
524.061	66.0258	61.9058	60.0343	59.694
524.543	65.7871	61.872	59.8204	59.5064
525.025	65.555	61.843	59.6143	59.3271
525.507	65.3298	61.8177	59.4176	59.1562
525.989	65.1143	61.7958	59.2318	58.9956
526.471	64.9132	61.7764	59.0596	58.8492
526.954	64.7315	61.7591	58.904	58.7216
527.436	64.5734	61.7438	58.7676	58.6155
527.918	64.4409	61.7309	58.6524	58.5311
528.4	64.3338	61.721	58.5588	58.4662
528.882	64.2518	61.7145	58.4873	58.4189
529.364	64.1933	61.7111	58.4381	58.3878
529.846	64.1575	61.7118	58.4098	58.3705
530.328	64.1482	61.7163	58.404	58.3712
530.811	64.1673	61.7243	58.4215	58.3919
531.293	64.2152	61.7359	58.4617	58.4325
531.775	64.2914	61.7511	58.5237	58.4916
532.257	64.39	61.7697	58.6037	58.5623
532.739	64.5055	61.7917	58.6979	58.6393
533.221	64.6347	61.817	58.8039	58.7203
533.703	64.7777	61.8441	58.9226	58.8098
534.185	64.9309	61.8737	59.0509	58.9053
534.667	65.094	61.905	59.1891	59.01
535.149	65.266	61.9382	59.3367	59.1242
535.632	65.4432	61.9734	59.4918	59.2447
536.114	65.6239	62.0105	59.6537	59.3705
536.596	65.8049	62.0503	59.8189	59.4971
537.078	65.9844	62.0926	59.9857	59.6234
537.56	66.1634	62.1372	60.1534	59.7511
538.042	66.3445	62.1841	60.3222	59.8835
538.524	66.5305	62.2332	60.4934	60.0244
539.006	66.7232	62.2846	60.6679	60.1751
539.489	66.9221	62.3387	60.8453	60.3337
539.971	67.1252	62.3964	61.0241	60.4959
540.453	67.3298	62.4582	61.2016	60.6562
540.935	67.5345	62.5228	61.3768	60.8121
541.417	67.7393	62.5896	61.5488	60.9627
541.899	67.9451	62.6574	61.7171	61.1086
542.381	68.1525	62.7254	61.8816	61.2509
542.863	68.3607	62.793	62.0412	61.3888
543.346	68.5658	62.8592	62.1942	61.5192
543.828	68.7634	62.9232	62.3381	61.6387
544.31	68.9487	62.984	62.4702	61.7438
544.792	69.118	63.0403	62.5883	61.833
545.274	69.2697	63.0903	62.6919	61.9074
545.756	69.4026	63.1339	62.779	61.9666
546.238	69.5188	63.1707	62.8509	62.0144
546.72	69.6186	63.2009	62.908	62.0517
547.202	69.7009	63.2254	62.9501	62.078
547.685	69.7658	63.246	62.9773	62.0931
548.167	69.8099	63.2637	62.9882	62.0935
548.649	69.8328	63.2785	62.9841	62.0802
549.131	69.836	63.2911	62.9664	62.055
549.613	69.8223	63.302	62.9376	62.0204
550.095	69.795	63.3112	62.9003	61.9785
550.577	69.7559	63.3203	62.8555	61.9279
551.059	69.7056	63.33	62.8035	61.8663
551.542	69.6432	63.3411	62.7432	61.7897
552.024	69.5677	63.3533	62.6739	61.6957
552.506	69.4792	63.366	62.5956	61.585
552.988	69.3791	63.3801	62.5073	61.4593
553.47	69.2706	63.3946	62.4112	61.3246
553.952	69.1544	63.4099	62.3079	61.1828
554.434	69.0316	63.4269	62.1983	61.0354
554.916	68.9009	63.4466	62.0823	60.8815
555.398	68.7604	63.4701	61.9596	60.7187
555.881	68.6059	63.4982	61.8282	60.543
556.363	68.4376	63.5317	61.688	60.3558
556.845	68.255	63.5713	61.5378	60.1576
557.327	68.0593	63.6166	61.3775	59.9517
557.809	67.8517	63.6671	61.2074	59.7412
558.291	67.6325	63.7222	61.0269	59.5272
558.773	67.4004	63.7814	60.8348	59.3084
559.255	67.1524	63.8438	60.6295	59.0809
559.737	66.8855	63.9076	60.4102	58.8413
560.22	66.5977	63.9718	60.1755	58.5862
560.702	66.2889	64.0353	59.9253	58.3147
561.184	65.9605	64.097	59.6604	58.0278
561.666	65.6145	64.1563	59.3814	57.7267
562.148	65.252	64.2132	59.0886	57.4117
562.63	64.8726	64.2677	58.7812	57.0821
563.112	64.4748	64.3195	58.4585	56.7362
563.594	64.0568	64.3696	58.1187	56.372
564.077	63.6182	64.4173	57.7624	55.991
564.559	63.161	64.4631	57.3906	55.5967
565.041	62.6882	64.5069	57.0057	55.1938
565.523	62.203	64.5499	56.6096	54.7854
566.005	61.7095	64.5933	56.2051	54.3754
566.487	61.2091	64.6377	55.7938	53.9645
566.969	60.7021	64.6844	55.3763	53.5512
567.451	60.1889	64.7324	54.954	53.1354
567.933	59.6725	64.7817	54.5289	52.72
568.416	59.1554	64.8316	54.1023	52.3062
568.898	58.6429	64.8802	53.6779	51.8992
569.38	58.1403	64.9265	53.2589	51.5034
569.862	57.6513	64.9695	52.8484	51.1214
570.344	57.1774	65.0088	52.448	50.7529
570.826	56.7179	65.044	52.0589	50.3963
571.308	56.2718	65.0751	51.6818	50.0501
571.79	55.8394	65.1022	51.3179	49.7151
572.273	55.4228	65.1254	50.9692	49.3943
572.755	55.0263	65.1452	50.6383	49.0921
573.237	54.6541	65.1622	50.3278	48.8121
573.719	54.3095	65.1773	50.04	48.5556
574.201	53.9937	65.1913	49.776	48.3212
574.683	53.7067	65.2042	49.5366	48.1059
575.165	53.4481	65.2167	49.322	47.9073
575.647	53.2194	65.2276	49.1333	47.7265
576.13	53.0234	65.2372	48.9714	47.5655
576.612	52.8643	65.2451	48.8379	47.4287
577.094	52.7461	65.2507	48.7351	47.3201
577.576	52.6709	65.2538	48.664	47.241
578.058	52.6386	65.2549	48.6248	47.1901
578.54	52.6476	65.2542	48.6171	47.1644
579.022	52.6966	65.2515	48.6408	47.162
579.504	52.7849	65.2474	48.6949	47.1822
579.986	52.9136	65.2423	48.7794	47.227
580.468	53.0839	65.2362	48.8943	47.2996
580.951	53.2961	65.2295	49.0393	47.4025
581.433	53.548	65.2227	49.213	47.5357
581.915	53.8348	65.2166	49.4129	47.6966
582.397	54.1504	65.2117	49.6362	47.8812
582.879	54.4887	65.2086	49.8798	48.0861
583.361	54.8455	65.2073	50.1414	48.3094
583.843	55.2184	65.2073	50.4192	48.5509
584.325	55.6066	65.2081	50.7121	48.8108
584.808	56.0089	65.209	51.0189	49.0882
585.29	56.4226	65.2092	51.3375	49.3797
585.772	56.8436	65.2081	51.6647	49.6797
586.254	57.2672	65.2047	51.9968	49.9819
586.736	57.689	65.1981	52.3298	50.2812
587.218	58.1063	65.1874	52.6605	50.575
587.7	58.518	65.1716	52.9863	50.8627
588.182	58.9235	65.1503	53.3056	51.1445
588.664	59.3214	65.1235	53.6171	51.4197
589.147	59.7093	65.0915	53.9194	51.6857
589.629	60.0829	65.0553	54.2104	51.9381
590.111	60.438	65.0156	54.4879	52.1726
590.593	60.7712	64.9731	54.75	52.3864
591.075	61.0808	64.9279	54.9953	52.5793
591.557	61.3669	64.8803	55.2233	52.7536
592.039	61.6304	64.8301	55.4342	52.9122
592.521	61.8715	64.7772	55.6279	53.0575
593.004	62.0892	64.7219	55.8045	53.1897
593.486	62.281	64.6643	55.9631	53.3075
593.968	62.4443	64.6045	56.1026	53.4085
594.45	62.5772	64.5424	56.2218	53.4915
594.932	62.6798	64.4776	56.3204	53.5571
595.414	62.7539	64.41	56.3987	53.6077
595.896	62.8025	64.3397	56.4575	53.6462
596.378	62.8285	64.2671	56.498	53.675
596.861	62.8336	64.1933	56.5208	53.6942
597.343	62.8182	64.1197	56.526	53.7026
597.825	62.7819	64.0475	56.5135	53.6981
598.307	62.7246	63.9778	56.4831	53.6793
598.789	62.6471	63.9111	56.4352	53.6466
599.271	62.5512	63.8478	56.3714	53.6015
599.753	62.4396	63.7883	56.2935	53.5466
600.235	62.3144	63.7329	56.2036	53.4832
600.717	62.1765	63.682	56.1035	53.4114
601.199	62.0258	63.636	55.9943	53.3296
601.682	61.8617	63.595	55.8764	53.236
602.164	61.6843	63.5589	55.7505	53.13
602.646	61.4952	63.5268	55.6173	53.0128
603.128	61.2974	63.4979	55.4785	52.8879
603.61	61.0951	63.4712	55.3359	52.7597
604.092	60.8924	63.4458	55.1919	52.6318
604.574	60.6923	63.4214	55.0483	52.5067
605.057	60.4967	63.3979	54.9069	52.3852
605.539	60.3073	63.3756	54.7695	52.2674
606.021	60.1262	63.3546	54.6381	52.1543
606.503	59.9568	63.3353	54.5156	52.0485
606.985	59.804	63.3179	54.4056	51.9539
607.467	59.6733	63.3026	54.3119	51.8748
607.949	59.5697	63.2897	54.2383	51.8145
608.431	59.497	63.28	54.1877	51.7745
608.913	59.4571	63.2739	54.162	51.7547
609.395	59.451	63.2718	54.1625	51.7543
609.878	59.4796	63.274	54.1903	51.7732
610.36	59.5445	63.2804	54.2466	51.8124
610.842	59.6477	63.291	54.3333	51.8745
611.324	59.791	63.3056	54.4519	51.9616
611.806	59.975	63.3241	54.6037	52.0752
612.288	60.1988	63.3463	54.7884	52.2144
612.77	60.4594	63.372	55.0045	52.3772
613.252	60.7532	63.4004	55.249	52.5608
613.735	61.0765	63.4307	55.5182	52.7632
614.217	61.4264	63.4615	55.8082	52.9836
614.699	61.8007	63.4917	56.1156	53.2225
615.181	62.1973	63.5204	56.4374	53.4806
615.663	62.613	63.5476	56.7704	53.7569
616.145	63.0434	63.5735	57.1116	54.049
616.627	63.483	63.5988	57.4572	54.3527
617.109	63.9256	63.6241	57.8034	54.6636
617.591	64.3664	63.6499	58.1467	54.978
618.074	64.8015	63.6763	58.4839	55.2938
618.556	65.2287	63.7027	58.8127	55.6104
619.038	65.6463	63.7289	59.1314	55.9273
619.52	66.0524	63.7548	59.4387	56.2435
620.002	66.4442	63.7803	59.7334	56.5566
620.484	66.8185	63.8063	60.0143	56.863
620.966	67.1721	63.8333	60.2806	57.1595
621.448	67.5029	63.8621	60.5323	57.4439
621.931	67.8108	63.8933	60.7698	57.7157
622.413	68.0965	63.927	60.9946	57.9757
622.895	68.3617	63.9632	61.2079	58.2252
623.377	68.6078	64.0018	61.4108	58.4648
623.859	68.8353	64.0424	61.6033	58.6939
624.341	69.0439	64.0846	61.7846	58.9109
624.823	69.2332	64.1277	61.9538	59.1142
625.305	69.4037	64.1713	62.1101	59.3029
625.788	69.5567	64.2145	62.2535	59.4774
626.27	69.6943	64.257	62.3848	59.6393
626.752	69.8191	64.2985	62.5053	59.7901
627.234	69.9329	64.339	62.6164	59.9309
627.716	70.0367	64.3789	62.719	60.0619
628.198	70.1305	64.4188	62.8135	60.1826
628.68	70.2141	64.4591	62.9001	60.2925
629.162	70.2877	64.4997	62.9789	60.3921
629.644	70.3525	64.5403	63.0504	60.4829
630.126	70.4101	64.5803	63.1155	60.5671
630.609	70.4625	64.6194	63.1755	60.6467
631.091	70.5113	64.6573	63.2315	60.7223
631.573	70.5567	64.6942	63.2839	60.7933
632.055	70.5984	64.7307	63.333	60.8583
632.537	70.6356	64.7675	63.3786	60.9156
633.019	70.668	64.8049	63.4204	60.9647
633.501	70.6961	64.8429	63.4585	61.0063
633.984	70.721	64.8815	63.4933	61.0423
634.466	70.7442	64.9201	63.5256	61.0747
634.948	70.7662	64.9584	63.5559	61.1043
635.43	70.7872	64.9966	63.5843	61.1308
635.912	70.8059	65.0347	63.6109	61.1529
636.394	70.8213	65.0733	63.6354	61.1691
636.876	70.8325	65.1127	63.6576	61.1786
637.358	70.8395	65.1531	63.6778	61.1819
637.84	70.8429	65.1947	63.6964	61.1808
638.322	70.8437	65.2375	63.7135	61.1772
638.805	70.8423	65.2817	63.7294	61.1722
639.287	70.8386	65.3277	63.7433	61.1661
639.769	70.8316	65.3758	63.7541	61.1579
640.251	70.8204	65.4263	63.7604	61.1463
640.733	70.8044	65.4794	63.761	61.131
641.215	70.784	65.5349	63.7551	61.1125
641.697	70.7603	65.5925	63.7423	61.092
642.179	70.7343	65.6519	63.7229	61.0711
642.662	70.7068	65.7133	63.6975	61.0508
643.144	70.6779	65.7767	63.6668	61.0309
643.626	70.6468	65.8426	63.6316	61.0105
644.108	70.613	65.9111	63.5931	60.9887
644.59	70.5767	65.9822	63.5529	60.965
645.072	70.5387	66.0552	63.513	60.9404
645.554	70.5007	66.1296	63.4761	60.9165
646.036	70.4645	66.2046	63.4445	60.8951
646.519	70.4314	66.2797	63.4207	60.8772
647.001	70.4019	66.3551	63.4061	60.8632
647.483	70.3757	66.4308	63.4016	60.8525
647.965	70.3522	66.5071	63.4075	60.8446
648.447	70.3316	66.5841	63.4235	60.8395
648.929	70.3147	66.6614	63.4494	60.8378
649.411	70.3027	66.7385	63.4845	60.8407
649.893	70.2973	66.8151	63.5283	60.8487
650.375	70.2993	66.8911	63.5797	60.8618
650.857	70.3086	66.9667	63.6375	60.8786
651.34	70.3246	67.0427	63.7001	60.8972
651.822	70.3462	67.1196	63.7659	60.9161
652.304	70.3728	67.1976	63.8334	60.9348
652.786	70.4042	67.2766	63.9014	60.9539
653.268	70.4409	67.3561	63.9688	60.9752
653.75	70.4833	67.4354	64.035	61.0002
654.232	70.5315	67.5143	64.0996	61.0295
654.715	70.5847	67.5928	64.1621	61.0624
655.197	70.6414	67.6711	64.2224	61.0976
655.679	70.7005	67.7493	64.2803	61.1337
656.161	70.761	67.8273	64.3358	61.17
656.643	70.8231	67.9039	64.3891	61.2072
657.125	70.887	67.9779	64.4398	61.2467
657.607	70.9532	68.0475	64.4878	61.29
658.089	71.0216	68.1116	64.5328	61.3378
658.571	71.0917	68.1699	64.5751	61.3898
659.053	71.1624	68.2232	64.6159	61.4451
659.536	71.233	68.2728	64.6573	61.5024
660.018	71.3034	68.3208	64.7022	61.5611
660.5	71.3744	68.369	64.7536	61.6216
660.982	71.4475	68.4182	64.8138	61.6846
661.464	71.5236	68.4684	64.8826	61.7511
661.946	71.6026	68.5182	64.9574	61.8208
662.428	71.6828	68.5673	65.0353	61.8913
662.91	71.7607	68.6161	65.114	61.9587
663.393	71.8331	68.6654	65.1918	62.0194
663.875	71.8983	68.7145	65.2659	62.0724
664.357	71.9565	68.762	65.3337	62.1192
664.839	72.0095	68.8072	65.395	62.1623
665.321	72.0593	68.8504	65.4508	62.2039
665.803	72.1072	68.8928	65.5032	62.2452
666.285	72.154	68.9353	65.5534	62.2859
666.767	72.1995	68.9784	65.6016	62.3251
667.25	72.2433	69.0218	65.6466	62.3617
667.732	72.2851	69.0641	65.6868	62.395
668.214	72.3254	69.1039	65.7207	62.4258
668.696	72.3652	69.1402	65.748	62.455
669.178	72.4056	69.1729	65.7698	62.4841
669.66	72.4474	69.2033	65.7885	62.5139
670.142	72.491	69.2336	65.8068	62.5446
670.624	72.5363	69.2666	65.8277	62.5758
671.106	72.5833	69.3044	65.8534	62.6072
671.589	72.632	69.3483	65.8849	62.6392
672.071	72.683	69.398	65.9221	62.6725
672.553	72.737	69.4522	65.9631	62.7082
673.035	72.7936	69.5087	66.0056	62.7465
673.517	72.8513	69.5661	66.0471	62.7859
673.999	72.9077	69.6243	66.0868	62.8239
674.481	72.9605	69.6836	66.1247	62.858
674.963	73.0087	69.7432	66.1595	62.8881
675.446	73.0529	69.8015	66.1899	62.916
675.928	73.0947	69.858	66.2167	62.9443
676.41	73.1361	69.9129	66.2426	62.9749
676.892	73.1783	69.967	66.27	63.0088
677.374	73.2218	70.0205	66.3	63.0457
677.856	73.2661	70.0731	66.332	63.0845
678.338	73.3101	70.1245	66.3639	63.1231
678.82	73.3525	70.1742	66.3938	63.1601
679.302	73.3928	70.222	66.4203	63.1949
679.784	73.4311	70.2684	66.4431	63.228
680.267	73.4682	70.314	66.4631	63.2606
680.749	73.505	70.3599	66.4812	63.2939
681.231	73.5417	70.407	66.4981	63.3283
681.713	73.5781	70.456	66.5137	63.3629
682.195	73.6132	70.5073	66.5276	63.3965
682.677	73.6461	70.5609	66.5391	63.4275
683.159	73.6765	70.6164	66.5479	63.4553
683.641	73.7046	70.6733	66.5544	63.48
684.124	73.7312	70.731	66.5594	63.5024
684.606	73.757	70.7889	66.5635	63.5231
685.088	73.7821	70.8468	66.5666	63.5424
685.57	73.8059	70.9046	66.5676	63.5598
686.052	73.8276	70.962	66.5652	63.5742
686.534	73.8459	71.019	66.5575	63.5849
687.016	73.8603	71.0756	66.5435	63.5915
687.498	73.8709	71.1316	66.5228	63.5942
687.981	73.8782	71.1868	66.4957	63.5937
688.463	73.8824	71.2411	66.4627	63.59
688.945	73.8835	71.2943	66.4242	63.5826
689.427	73.8805	71.3463	66.3797	63.57
689.909	73.8722	71.3971	66.3286	63.5502
690.391	73.8575	71.4464	66.2704	63.5215
690.873	73.8357	71.494	66.2048	63.4832
691.355	73.8068	71.5395	66.1321	63.4351
691.837	73.7711	71.5825	66.0532	63.3774
692.32	73.7285	71.6228	65.9685	63.3101
692.802	73.6786	71.6602	65.8781	63.2326
693.284	73.6196	71.6945	65.7808	63.1433
693.766	73.5494	71.7256	65.6749	63.0403
694.248	73.4659	71.7532	65.5583	62.9219
694.73	73.3673	71.7772	65.429	62.7874
695.212	73.2528	71.7976	65.2852	62.6369
695.694	73.122	71.8147	65.1257	62.4712
696.177	72.9747	71.8291	64.9493	62.291
696.659	72.8103	71.8418	64.7549	62.0965
697.141	72.6276	71.854	64.5413	61.8872
697.623	72.4253	71.8668	64.3081	61.6626
698.105	72.2022	71.8812	64.0557	61.4228
698.587	71.9583	71.8978	63.7861	61.1691
699.069	71.6948	71.917	63.503	60.9041
699.551	71.4138	71.9388	63.2112	60.631
700.033	71.118	71.9633	62.9159	60.3534
700.516	70.8102	71.9905	62.6221	60.0739
700.998	70.4931	72.0207	62.3343	59.795
701.48	70.1695	72.0539	62.0563	59.5184
701.962	69.8429	72.0901	61.7918	59.2467
702.444	69.5177	72.1294	61.5447	58.9834
702.926	69.1996	72.1717	61.3189	58.7329
703.408	68.8948	72.2171	61.1186	58.5002
703.89	68.6092	72.2658	60.9472	58.2896
704.372	68.3484	72.3185	60.8074	58.1042
704.855	68.1167	72.3757	60.7004	57.9459
705.337	67.9179	72.4381	60.6267	57.8155
705.819	67.7554	72.5061	60.5859	57.714
706.301	67.6326	72.58	60.5773	57.6423
706.783	67.5531	72.6599	60.6003	57.602
707.265	67.5198	72.7454	60.6542	57.5947
707.747	67.5345	72.8365	60.7378	57.621
708.229	67.5978	72.9327	60.8496	57.6805
708.712	67.7083	73.0338	60.9877	57.7718
709.194	67.8637	73.139	61.1503	57.8927
709.676	68.0609	73.2474	61.3358	58.0411
710.158	68.2972	73.3577	61.5431	58.2158
710.64	68.5695	73.4687	61.7716	58.4159
711.122	68.8751	73.5788	62.0207	58.6406
711.604	69.2102	73.6869	62.2896	58.8888
712.086	69.5705	73.7922	62.5766	59.1581
712.568	69.951	73.8945	62.8795	59.4456
713.051	70.3463	73.9937	63.1958	59.7478
713.533	70.7516	74.09	63.5231	60.0619
714.015	71.1627	74.1839	63.8595	60.3854
714.497	71.5766	74.2756	64.2033	60.7165
714.979	71.9907	74.3653	64.5531	61.0537
715.461	72.4024	74.4532	64.9065	61.3948
715.943	72.8091	74.5394	65.2606	61.7371
716.425	73.2081	74.624	65.6118	62.078
716.908	73.5967	74.7071	65.9563	62.4146
717.39	73.9734	74.7885	66.2906	62.7453
717.872	74.3373	74.8681	66.6123	63.0697
718.354	74.6883	74.9458	66.9202	63.388
718.836	75.0269	75.0215	67.214	63.7007
719.318	75.3534	75.0952	67.4938	64.008
719.8	75.6675	75.1673	67.76	64.3094
720.282	75.969	75.2381	68.0126	64.6037
720.764	76.2574	75.3079	68.2518	64.8901
721.247	76.5326	75.3769	68.4779	65.1682
721.729	76.7953	75.4453	68.6916	65.4388
722.211	77.0466	75.5131	68.8943	65.7031
722.693	77.288	75.5808	69.0873	65.9623
723.175	77.5203	75.6487	69.2722	66.2173
723.657	77.7441	75.7179	69.4502	66.4679
724.139	77.9595	75.7892	69.6224	66.7131
724.621	78.1662	75.8637	69.7894	66.9516
725.104	78.3642	75.9417	69.9521	67.1823
725.586	78.554	76.0232	70.1111	67.4048
726.068	78.7364	76.1075	70.2673	67.6196
726.55	78.9126	76.1936	70.4212	67.8273
727.032	79.0833	76.2803	70.573	68.0285
727.514	79.2492	76.3666	70.7222	68.2235
727.996	79.4101	76.4514	70.8684	68.4123
728.478	79.566	76.5344	71.0109	68.5946
728.96	79.7167	76.6147	71.1496	68.7706
729.443	79.8626	76.692	71.2846	68.9407
729.925	80.0044	76.7659	71.4168	69.1055
730.407	80.1427	76.8359	71.5471	69.2656
730.889	80.2782	76.902	71.6762	69.4212
731.371	80.4109	76.9644	71.8039	69.5719
731.853	80.5405	77.0232	71.9298	69.7169
732.335	80.6665	77.079	72.0528	69.8556
732.817	80.7887	77.132	72.1722	69.9877
733.299	80.907	77.1825	72.2875	70.1134
733.782	81.022	77.2305	72.3987	70.2335
734.264	81.1344	77.2764	72.5063	70.3487
734.746	81.2443	77.3205	72.6106	70.459
735.228	81.3518	77.3631	72.7117	70.5638
735.71	81.4562	77.4048	72.809	70.662
736.192	81.5566	77.4458	72.9021	70.7523
736.674	81.6523	77.4862	72.9901	70.8335
737.156	81.7428	77.5258	73.0728	70.9051
737.639	81.8279	77.5642	73.1498	70.967
738.121	81.9075	77.6009	73.2214	71.0194
738.603	81.9812	77.6359	73.2872	71.0618
739.085	82.0483	77.6691	73.3466	71.0932
739.567	82.1074	77.7007	73.3984	71.1121
740.049	82.1567	77.7314	73.4411	71.1162
740.531	82.1945	77.7614	73.473	71.1034
741.013	82.219	77.7914	73.4927	71.0717
741.495	82.2287	77.8216	73.4989	71.0193
741.978	82.2218	77.8525	73.4903	70.9443
742.46	82.1963	77.8848	73.4651	70.8445
742.942	82.1496	77.9188	73.4209	70.7174
743.424	82.0782	77.9551	73.3547	70.5601
743.906	81.9784	77.9939	73.2631	70.3701
744.388	81.8468	78.035	73.1426	70.1456
744.87	81.6798	78.078	72.99	69.8856
745.352	81.4748	78.1222	72.8029	69.5905
745.835	81.2296	78.1671	72.5794	69.2617
746.317	80.9424	78.2119	72.3181	68.9008
746.799	80.6122	78.2563	72.0182	68.5097
747.281	80.2385	78.2997	71.6796	68.0909
747.763	79.8219	78.3416	71.3034	67.6474
748.245	79.3653	78.3813	70.8925	67.1834
748.727	78.8734	78.4182	70.4517	66.7047
749.209	78.3531	78.4517	69.9879	66.2179
749.692	77.8131	78.4815	69.5096	65.7304
750.174	77.2629	78.5079	69.0259	65.2493
750.656	76.7123	78.5316	68.5464	64.7808
751.138	76.1708	78.5535	68.08	64.3304
751.62	75.6475	78.5746	67.6351	63.9028
752.102	75.1507	78.5956	67.2193	63.5022
752.584	74.6884	78.6169	66.8393	63.133
753.066	74.2675	78.6387	66.5008	62.7988
753.548	73.8937	78.6607	66.2081	62.5028
754.03	73.5705	78.6829	65.9634	62.247
754.513	73.2996	78.705	65.7672	62.0317
754.995	73.0805	78.7271	65.6179	61.8561
755.477	72.911	78.7489	65.5126	61.719
755.959	72.7881	78.77	65.4477	61.6186
756.441	72.708	78.79	65.4193	61.5537
756.923	72.667	78.808	65.4232	61.5236
757.405	72.6613	78.8234	65.4557	61.5275
757.888	72.687	78.8358	65.5131	61.5641
758.37	72.7404	78.8449	65.5917	61.632
758.852	72.8184	78.8508	65.6886	61.7295
759.334	72.919	78.8539	65.8013	61.8552
759.816	73.0417	78.8542	65.9288	62.0086
760.298	73.1878	78.8518	66.0715	62.1898
760.78	73.3597	78.8469	66.2306	62.3996
761.262	73.5606	78.8395	66.4083	62.6382
761.744	73.7934	78.8298	66.6068	62.9057
762.226	74.0604	78.8181	66.8279	63.2008
762.709	74.3628	78.8045	67.0729	63.5216
763.191	74.7013	78.7889	67.3423	63.866
763.673	75.0756	78.7712	67.6363	64.2317
764.155	75.4848	78.7508	67.9545	64.6168
764.637	75.927	78.7271	68.2959	65.0192
765.119	76.3993	78.7001	68.6589	65.436
765.601	76.8972	78.6697	69.0407	65.8635
766.083	77.4149	78.6366	69.4376	66.297
766.566	77.9456	78.6015	69.845	66.7313
767.048	78.4819	78.5653	70.2578	67.161
767.53	79.0166	78.5287	70.6708	67.5815
768.012	79.5431	78.4923	71.0791	67.9894
768.494	80.0553	78.4565	71.4784	68.3818
768.976	80.5479	78.4216	71.8648	68.7566
769.458	81.0162	78.3884	72.2352	69.1121
769.94	81.4562	78.3576	72.5866	69.4467
770.423	81.8652	78.3299	72.9167	69.7593
770.905	82.2413	78.3056	73.2243	70.0497
771.387	82.5845	78.2848	73.5088	70.3185
771.869	82.896	78.2669	73.771	70.5674
772.351	83.1782	78.2513	74.0127	70.7988
772.833	83.4341	78.2368	74.2363	71.0156
773.315	83.6672	78.2227	74.4445	71.2204
773.797	83.881	78.2082	74.6399	71.4159
774.279	84.0789	78.1927	74.8248	71.6044
774.761	84.2647	78.1757	75.0017	71.7888
775.244	84.4422	78.1568	75.1727	71.972
775.726	84.6155	78.1354	75.3403	72.1571
776.208	84.7886	78.1114	75.5069	72.3472
776.69	84.9651	78.0848	75.6749	72.5445
777.172	85.1477	78.0561	75.8461	72.7506
777.654	85.3384	78.0261	76.0219	72.9659
778.136	85.5385	77.9958	76.2031	73.1902
778.619	85.7484	77.9661	76.3899	73.423
779.101	85.9683	77.9377	76.5823	73.6636
779.583	86.1982	77.9113	76.7804	73.9118
780.065	86.4376	77.8872	76.9842	74.1669
780.547	86.6858	77.866	77.1934	74.4282
781.029	86.9414	77.8482	77.4075	74.6942
781.511	87.2023	77.8344	77.6253	74.9626
781.993	87.4661	77.8253	77.8451	75.2307
782.475	87.7301	77.8212	78.0649	75.4958
782.957	87.9917	77.822	78.2827	75.7554
783.44	88.2487	77.8276	78.4965	76.0074
783.922	88.4991	77.8373	78.7048	76.2502
784.404	88.7412	77.8507	78.9062	76.4823
784.886	88.9731	77.8675	79.0996	76.7025
785.368	89.1933	77.8877	79.2837	76.9094
785.85	89.3999	77.9115	79.4573	77.1018
786.332	89.5916	77.9387	79.6194	77.279
786.814	89.7676	77.9695	79.7694	77.4411
787.297	89.9275	78.0034	79.9074	77.5886
787.779	90.0717	78.0401	80.0342	77.7228
788.261	90.2009	78.0792	80.1506	77.8455
788.743	90.3161	78.1204	80.258	77.9583
789.225	90.4188	78.1637	80.3576	78.0629
789.707	90.5105	78.2089	80.4504	78.1615
790.189	90.5933	78.2561	80.5375	78.2561
790.671	90.6697	78.305	80.6203	78.3497
791.154	90.7428	78.3552	80.7006	78.4454
791.636	90.8162	78.4067	80.7806	78.5465
792.118	90.8934	78.4594	80.8626	78.6559
792.6	90.9778	78.5139	80.949	78.7764
793.082	91.0721	78.5708	81.0421	78.9097
793.564	91.1789	78.631	81.1434	79.0571
794.046	91.2999	78.6956	81.2546	79.2198
794.528	91.4367	78.7653	81.3769	79.3984
795.01	91.5903	78.8408	81.5113	79.5934
795.493	91.7613	78.9226	81.6587	79.8051
795.975	91.9497	79.0112	81.8195	80.0331
796.457	92.1546	79.1072	81.9935	80.2764
796.939	92.3744	79.2114	82.1796	80.5333
797.421	92.6069	79.324	82.3761	80.8015
797.903	92.8495	79.4453	82.581	81.0786
798.385	93.0995	79.5747	82.792	81.3623
798.867	93.3545	79.7115	83.007	81.6506
799.35	93.6122	79.8545	83.224	81.9414
799.832	93.8704	80.0024	83.4415	82.233
800.314	94.1272	80.1543	83.6578	82.5233
800.796	94.3805	80.3091	83.8715	82.8104
801.278	94.6287	80.4661	84.0811	83.0923
801.76	94.8702	80.6244	84.2854	83.3677
802.242	95.1043	80.783	84.4836	83.6356
802.724	95.3303	80.9409	84.6755	83.8954
803.206	95.5484	81.097	84.8613	84.1472
803.688	95.7587	81.2506	85.0416	84.3909
804.171	95.9617	81.4014	85.2169	84.6266
804.653	96.1576	81.5495	85.3873	84.8541
805.135	96.3466	81.695	85.553	85.0733
805.617	96.5291	81.838	85.7134	85.2844
806.099	96.7053	81.9785	85.8684	85.4876
806.581	96.8756	82.1162	86.0178	85.6836
807.063	97.0408	82.2506	86.1615	85.8731
807.545	97.2012	82.3813	86.3	86.0568
808.028	97.3573	82.5078	86.4336	86.235
808.51	97.5093	82.6299	86.5626	86.4079
808.992	97.6574	82.7476	86.6875	86.5756
809.474	97.8015	82.8604	86.8085	86.738
809.956	97.9418	82.9678	86.9263	86.8953
810.438	98.0786	83.0694	87.0417	87.0477
810.92	98.2121	83.1648	87.1555	87.1956
811.402	98.3427	83.2538	87.2686	87.3394
811.885	98.4704	83.3367	87.3814	87.4794
812.367	98.5952	83.4142	87.494	87.6155
812.849	98.717	83.4869	87.6061	87.7476
813.331	98.8353	83.5553	87.7171	87.8758
813.813	98.9501	83.62	87.8266	88.0002
814.295	99.0614	83.6809	87.9343	88.1208
814.777	99.1693	83.7379	88.04	88.2378
815.259	99.2741	83.7909	88.1441	88.3515
815.741	99.3759	83.84	88.2465	88.4616
816.224	99.4744	83.8851	88.3473	88.5679
816.706	99.5696	83.9264	88.446	88.6697
817.188	99.661	83.9637	88.5424	88.7666
817.67	99.7484	83.9965	88.6361	88.8584
818.152	99.8318	84.0245	88.7271	88.9446
818.634	99.911	84.047	88.8155	89.0254
819.116	99.9861	84.0642	88.9014	89.1001
819.598	100.057	84.0763	88.9847	89.1685
820.081	100.123	84.0842	89.065	89.2297
820.563	100.184	84.0887	89.1415	89.2827
821.045	100.24	84.0908	89.2133	89.3267
821.527	100.289	84.0915	89.2796	89.3607
822.009	100.331	84.0914	89.3398	89.3842
822.491	100.366	84.0914	89.3937	89.3965
822.973	100.394	84.0927	89.4413	89.397
823.455	100.414	84.0965	89.4824	89.3848
823.937	100.383	84.1042	89.5169	89.3588
824.42	100.343	84.1171	89.5444	89.3179
824.902	100.293	84.1362	89.5644	89.2608
825.384	100.232	84.1616	89.5763	89.1865
825.866	100.159	84.1935	89.5798	89.0943
826.348	100.075	84.2311	89.5745	88.9835
826.83	99.9784	84.2741	89.56	88.8537
827.312	99.8691	84.3218	89.5357	88.7042
827.794	99.7463	84.3738	89.5004	88.5344
828.277	99.6092	84.4296	89.4531	88.3437
828.759	99.4573	84.4887	89.3922	88.1315
829.241	99.29	84.5502	89.3168	87.8977
829.723	99.1071	84.6135	89.2263	87.6425
830.205	98.9086	84.6778	89.1206	87.3663
830.687	98.6949	84.7428	89	87.0697
831.169	98.4659	84.8083	88.8648	86.7536
831.651	98.222	84.8744	88.7154	86.4187
832.133	97.9632	84.9412	88.5521	86.0659
832.615	97.6899	85.0083	88.3755	85.6964
833.098	97.4026	85.0753	88.186	85.3119
833.58	97.1023	85.1413	87.9846	84.9142
834.062	96.7902	85.2053	87.7726	84.5058
834.544	96.468	85.2668	87.5514	84.089
835.026	96.1368	85.3252	87.3222	83.6662
835.508	95.7983	85.3803	87.0858	83.2395
835.99	95.4535	85.4318	86.8431	82.8109
836.472	95.1036	85.4796	86.5948	82.3828
836.955	94.7501	85.523	86.3416	81.9576
837.437	94.3945	85.5615	86.0847	81.5381
837.919	94.0386	85.5948	85.8257	81.1272
838.401	93.6843	85.6227	85.5663	80.7275
838.883	93.3333	85.6459	85.3082	80.3415
839.365	92.9869	85.6651	85.053	79.9707
839.847	92.6466	85.6815	84.8019	79.6167
840.329	92.3133	85.6959	84.5563	79.2806
840.812	91.9882	85.7091	84.3174	78.9635
841.294	91.6724	85.7214	84.0866	78.6665
841.776	91.3671	85.7331	83.8651	78.3907
842.258	91.0731	85.7445	83.6541	78.1367
842.74	90.7913	85.7558	83.4541	77.9048
843.222	90.5217	85.767	83.2652	77.6946
843.704	90.2646	85.778	83.0872	77.5056
844.186	90.0198	85.7882	82.9196	77.3371
844.668	89.7873	85.7965	82.7619	77.1885
845.151	89.5672	85.8019	82.614	77.0591
845.633	89.3595	85.8031	82.4758	76.9483
846.115	89.1642	85.7992	82.3475	76.8547
846.597	88.9808	85.7899	82.2288	76.7769
847.079	88.8085	85.7751	82.1191	76.7128
847.561	88.6465	85.7548	82.0177	76.6604
848.043	88.4937	85.729	81.9236	76.6179
848.525	88.3495	85.6977	81.8357	76.5839
849.008	88.2134	85.6608	81.7535	76.5572
849.49	88.0849	85.6181	81.6761	76.5371
849.972	87.9638	85.5699	81.6031	76.5225
850.454	87.8495	85.5163	81.5339	76.5122
850.936	87.7415	85.4579	81.4679	76.5047
851.418	87.639	85.3949	81.4045	76.4987
851.9	87.5415	85.3273	81.3435	76.4929
852.382	87.4486	85.2543	81.2854	76.487
852.864	87.3605	85.1753	81.231	76.4809
853.347	87.2774	85.0893	81.1814	76.475
853.829	87.1996	84.9957	81.1379	76.4697
854.311	87.127	84.8942	81.1016	76.4656
854.793	87.0597	84.7849	81.0731	76.4631
855.275	86.9976	84.668	81.0528	76.4629
855.757	86.9403	84.5438	81.0408	76.4657
856.239	86.8883	84.4126	81.0373	76.4729
856.721	86.8417	84.2748	81.0426	76.486
857.203	86.8011	84.1309	81.057	76.5067
857.686	86.7671	83.9818	81.0808	76.5365
858.168	86.7402	83.8288	81.1138	76.5769
858.65	86.721	83.673	81.1557	76.6291
859.132	86.71	83.5155	81.2062	76.6944
859.614	86.7084	83.3572	81.2651	76.7744
860.096	86.7177	83.1983	81.3325	76.8709
860.578	86.7402	83.0385	81.4096	76.986
861.06	86.7783	82.8777	81.4976	77.1214
861.543	86.8349	82.7154	81.5986	77.2787
862.025	86.9128	82.5514	81.7147	77.4589
862.507	87.0149	82.3855	81.8482	77.6628
862.989	87.1442	82.2173	82.0014	77.8907
863.471	87.3035	82.0465	82.1765	78.1435
863.953	87.4956	81.8727	82.3758	78.4216
864.435	87.7233	81.6953	82.6013	78.7258
864.917	87.9887	81.514	82.8544	79.0563
865.399	88.2932	81.3289	83.1362	79.4134
865.882	88.6372	81.1402	83.4465	79.7964
866.364	89.0205	80.9484	83.7847	80.2044
866.846	89.4416	80.754	84.1493	80.6362
867.328	89.8987	80.5573	84.5386	81.0905
867.81	90.3891	80.3585	84.9506	81.5663
868.292	90.9096	80.1576	85.3831	82.062
868.774	91.4562	79.9547	85.8337	82.5763
869.256	92.0245	79.7504	86.2997	83.107
869.739	92.6092	79.5454	86.7779	83.6518
870.221	93.2049	79.3405	87.2647	84.2079
870.703	93.8056	79.137	87.7562	84.7726
871.185	94.4056	78.9357	88.2488	85.3431
871.667	94.9996	78.7376	88.7389	85.9166
872.149	95.5825	78.5436	89.2235	86.4907
872.631	96.1495	78.3546	89.6997	87.0625
873.113	96.6965	78.1718	90.1653	87.6289
873.596	97.2194	77.9968	90.6179	88.1868
874.078	97.7148	77.8309	91.0551	88.7327
874.56	98.1795	77.6756	91.4749	89.2631
875.042	98.6111	77.5319	91.8753	89.7749
875.524	99.0072	77.4005	92.2546	90.2649
876.006	99.3665	77.2818	92.6117	90.7302
876.488	99.6875	77.1757	92.9456	91.1681
876.97	99.9694	77.0822	93.2557	91.5756
877.452	100.211	77.0008	93.5411	91.95
877.934	100.413	76.9308	93.8011	92.2884
878.417	100.574	76.8713	94.0346	92.5883
878.899	100.695	76.8209	94.241	92.8474
879.381	100.775	76.778	94.4196	93.0642
879.863	100.817	76.741	94.5701	93.2373
880.345	100.822	76.7085	94.6926	93.3662
880.827	100.79	76.6793	94.7873	93.4506
881.309	100.762	76.6528	94.855	93.491
881.791	100.703	76.6286	94.8963	93.4881
882.274	100.615	76.6065	94.9126	93.4437
882.756	100.502	76.5863	94.9054	93.3601
883.238	100.367	76.5675	94.8772	93.2403
883.72	100.215	76.5501	94.8307	93.0883
884.202	100.049	76.5337	94.7692	92.9086
884.684	99.874	76.5184	94.6962	92.7061
885.166	99.6949	76.5042	94.615	92.4859
885.648	99.5155	76.4915	94.5287	92.2533
886.13	99.3401	76.4804	94.4401	92.0138
886.613	99.1723	76.4709	94.3519	91.7724
887.095	99.0155	76.4627	94.2665	91.5345
887.577	98.873	76.4555	94.1865	91.3049
888.059	98.7472	76.449	94.1141	91.0877
888.541	98.6404	76.4428	94.0513	90.8868
889.023	98.5538	76.4372	93.9995	90.7046
889.505	98.4878	76.4321	93.9593	90.5431
889.987	98.4421	76.428	93.9309	90.4032
890.47	98.4158	76.4251	93.9141	90.2852
890.952	98.4075	76.4235	93.9083	90.1886
891.434	98.4153	76.4236	93.9131	90.1125
891.916	98.4368	76.4256	93.9275	90.0552
892.398	98.4696	76.4301	93.9503	90.0141
892.88	98.5106	76.438	93.9799	89.9862
893.362	98.5566	76.4499	94.0141	89.968
893.844	98.6041	76.4664	94.0503	89.9553
894.326	98.6497	76.4877	94.0857	89.9444
894.808	98.6903	76.5137	94.1179	89.9313
895.291	98.7228	76.544	94.1444	89.9127
895.773	98.7445	76.5781	94.1634	89.8852
896.255	98.7531	76.6154	94.1731	89.8457
896.737	98.7463	76.6551	94.1717	89.7913
897.219	98.7222	76.6964	94.158	89.7193
897.701	98.6792	76.7382	94.1304	89.6275
898.183	98.6158	76.7793	94.0881	89.5141
898.665	98.5314	76.8182	94.0304	89.3782
899.148	98.4255	76.8532	93.9573	89.2195
899.63	98.2982	76.8833	93.8691	89.0383
900.112	98.1498	76.9074	93.7662	88.8355
900.594	97.9811	76.925	93.6489	88.6123
901.076	97.7929	76.9357	93.5178	88.3702
901.558	97.5864	76.9394	93.3731	88.1113
902.04	97.3633	76.9355	93.2155	87.8379
902.522	97.1254	76.9237	93.0461	87.5527
903.005	96.8753	76.9037	92.8664	87.2587
903.487	96.6155	76.8752	92.6784	86.9587
903.969	96.3489	76.8382	92.4839	86.6555
904.451	96.0781	76.793	92.2849	86.3515
904.933	95.8057	76.74	92.0832	86.0487
905.415	95.534	76.6796	91.8803	85.7489
905.897	95.2651	76.612	91.6776	85.4536
906.379	95.0011	76.5373	91.4766	85.1642
906.861	94.7436	76.4553	91.2787	84.8817
907.344	94.4941	76.3663	91.0852	84.6067
907.826	94.2534	76.2704	90.8968	84.3391
908.308	94.0217	76.168	90.7137	84.0779
908.79	93.7984	76.0598	90.5352	83.8216
909.272	93.5825	75.9463	90.3602	83.5683
909.754	93.3725	75.828	90.1872	83.3158
910.236	93.1667	75.7054	90.0146	83.0619
910.718	92.9631	75.5791	89.8407	82.8046
911.201	92.76	75.4494	89.6638	82.542
911.683	92.5551	75.3172	89.4823	82.2719
912.165	92.3462	75.1829	89.2945	81.9924
912.647	92.1314	75.047	89.0985	81.7014
913.129	91.9084	74.9097	88.8929	81.3972
913.611	91.6758	74.7708	88.6765	81.0786
914.093	91.4323	74.6298	88.4489	80.7451
914.575	91.1774	74.4859	88.2101	80.3967
915.057	90.9109	74.3383	87.9605	80.0339
915.54	90.6331	74.1865	87.7007	79.6574
916.022	90.3442	74.03	87.4313	79.268
916.504	90.0449	73.8683	87.1528	78.8667
916.986	89.7357	73.701	86.8657	78.4548
917.468	89.4179	73.5277	86.5707	78.0339
917.95	89.0924	73.3481	86.2689	77.6057
918.432	88.7609	73.1618	85.9617	77.1722
918.914	88.4248	72.9691	85.6505	76.7353
919.396	88.0852	72.7705	85.3366	76.2965
919.879	87.7431	72.5668	85.0211	75.8568
920.361	87.3991	72.3589	84.7045	75.4168
920.843	87.0534	72.1478	84.3872	74.9768
921.325	86.7064	71.9343	84.0694	74.5372
921.807	86.3583	71.719	83.7511	74.0985
922.289	86.0092	71.5025	83.4326	73.6613
922.771	85.6591	71.285	83.1139	73.2258
923.253	85.3079	71.0671	82.7946	72.792
923.736	84.9548	70.8488	82.4741	72.3593
924.218	84.5987	70.6304	82.1514	71.9269
924.7	84.2382	70.4117	81.8251	71.4939
925.182	83.8721	70.1923	81.4942	71.0596
925.664	83.4989	69.9716	81.1576	70.624
926.146	83.1172	69.7489	80.8144	70.1871
926.628	82.7255	69.5239	80.4639	69.7492
927.11	82.3217	69.2961	80.1051	69.3106
927.592	81.9036	69.0655	79.7366	68.8714
928.075	81.4686	68.8322	79.3572	68.432
928.557	81.0142	68.5962	78.9653	67.9932
929.039	80.5385	68.3577	78.5602	67.5566
929.521	80.0402	68.1167	78.1414	67.1245
930.003	79.5191	67.8734	77.7096	66.7
930.485	78.9762	67.6282	77.266	66.2865
930.967	78.4134	67.3814	76.8125	65.8874
931.449	77.8339	67.1336	76.3521	65.506
931.932	77.2423	66.8854	75.8883	65.1454
932.414	76.6449	66.6372	75.4259	64.8092
932.896	76.05	66.3893	74.9712	64.5007
933.378	75.4671	66.1423	74.5313	64.2238
933.86	74.9073	65.8964	74.1145	63.9819
934.342	74.3821	65.6521	73.7293	63.7776
934.824	73.9025	65.41	73.3842	63.6126
935.306	73.4788	65.171	73.0867	63.4871
935.788	73.1195	64.9359	72.8434	63.4002
936.271	72.8312	64.7057	72.6589	63.3497
936.753	72.618	64.4812	72.5364	63.3328
937.235	72.481	64.2633	72.4766	63.3453
937.717	72.4181	64.0528	72.4778	63.3822
938.199	72.4234	63.8506	72.5353	63.4372
938.681	72.487	63.6574	72.6412	63.5027
939.163	72.5955	63.4741	72.7849	63.5705
939.645	72.7322	63.3009	72.9534	63.6323
940.128	72.8786	63.138	73.1325	63.6808
940.61	73.0156	62.9853	73.308	63.7102
941.092	73.1252	62.8421	73.4666	63.7175
941.574	73.1918	62.7077	73.5976	63.7021
942.056	73.2032	62.5812	73.6932	63.6663
942.538	73.1527	62.4617	73.7496	63.6151
943.02	73.0391	62.3482	73.7674	63.5561
943.502	72.8679	62.24	73.7519	63.4997
943.984	72.6513	62.1364	73.7128	63.4586
944.467	72.407	62.0365	73.6639	63.4471
944.949	72.1572	61.9398	73.6219	63.4803
945.431	71.9265	61.8458	73.6053	63.5729
945.913	71.7401	61.7545	73.6328	63.7377
946.395	71.6213	61.6656	73.722	63.9856
946.877	71.5909	61.5795	73.888	64.324
947.359	71.6655	61.4963	74.1428	64.7574
947.841	71.8572	61.4163	74.4944	65.2865
948.323	72.1727	61.3397	74.9466	65.9087
948.806	72.6133	61.2666	75.4986	66.6173
949.288	73.1742	61.1968	76.1447	67.4017
949.77	73.8449	61.1303	76.8744	68.2474
950.252	74.6092	61.0671	77.6728	69.1365
950.734	75.446	61.0069	78.5208	70.048
951.216	76.3302	60.9496	79.3969	70.9599
951.698	77.2345	60.8952	80.2777	71.8495
952.18	78.131	60.8435	81.1401	72.6958
952.663	78.9925	60.7946	81.9619	73.4797
953.145	79.7945	60.7488	82.7239	74.1852
953.627	80.5162	60.7064	83.4101	74.7998
954.109	81.1417	60.6683	84.0087	75.3148
954.591	81.6602	60.6352	84.512	75.7256
955.073	82.0667	60.608	84.9168	76.0312
955.555	82.3611	60.5875	85.2239	76.2344
956.037	82.5481	60.5743	85.4374	76.3406
956.519	82.6354	60.5686	85.5645	76.3575
957.002	82.6328	60.5706	85.6135	76.2938
957.484	82.5508	60.58	85.5937	76.1584
957.966	82.4	60.5962	85.5143	75.96
958.448	82.1902	60.6184	85.3836	75.7066
958.93	81.9299	60.6456	85.209	75.4056
959.412	81.627	60.6763	84.9969	75.0636
959.894	81.2881	60.7087	84.7526	74.6864
960.376	80.9189	60.7409	84.4806	74.2793
960.859	80.5241	60.7707	84.1847	73.8466
961.341	80.1077	60.7963	83.8676	73.3916
961.823	79.6723	60.8157	83.5315	72.9167
962.305	79.2199	60.8275	83.1775	72.4234
962.787	78.752	60.8305	82.8065	71.9126
963.269	78.2694	60.8235	82.419	71.3851
963.751	77.7732	60.806	82.0154	70.8418
964.233	77.2643	60.7774	81.5966	70.2838
964.716	76.7437	60.7373	81.1632	69.7123
965.198	76.2122	60.6857	80.716	69.1283
965.68	75.6703	60.6226	80.2553	68.5325
966.162	75.118	60.5483	79.7811	67.9248
966.644	74.5553	60.4631	79.2931	67.3052
967.126	73.9818	60.3673	78.7907	66.6735
967.608	73.3978	60.2615	78.2734	66.0297
968.09	72.8034	60.1459	77.741	65.374
968.572	72.1991	60.0211	77.1931	64.707
969.054	71.5854	59.8877	76.6295	64.029
969.537	70.9624	59.7463	76.0495	63.3396
970.019	70.3298	59.5978	75.4526	62.6382
970.501	69.6871	59.4429	74.8378	61.9239
970.983	69.0339	59.2824	74.2044	61.1962
971.465	68.3702	59.117	73.552	60.4546
971.947	67.6963	58.9473	72.8805	59.6996
972.429	67.0127	58.7741	72.1899	58.9317
972.911	66.3197	58.5978	71.4804	58.1513
973.394	65.6174	58.419	70.7515	57.3582
973.876	64.9054	58.2381	70.0026	56.5518
974.358	64.1831	58.0551	69.2328	55.7312
974.84	63.4499	57.87	68.4414	54.8959
975.322	62.7059	57.6822	67.6276	54.0459
975.804	61.9515	57.491	66.7912	53.1821
976.286	61.1873	57.2955	65.9323	52.306
976.768	60.4137	57.0947	65.051	51.4185
977.25	59.6307	56.8878	64.1473	50.5204
977.733	58.8377	56.6739	63.2209	49.6116
978.215	58.0335	56.452	62.2718	48.6918
978.697	57.2173	56.2215	61.3003	47.7613
979.179	56.3889	55.9815	60.307	46.8212
979.661	55.5486	55.7314	59.2933	45.8738
980.143	54.6971	55.4706	58.2609	44.9221
980.625	53.835	55.1986	57.2113	43.9684
981.107	52.962	54.9152	56.1459	43.0142
981.59	52.0775	54.6202	55.0658	42.0598
982.072	51.1801	54.3137	53.9717	41.1049
982.554	50.2687	53.9958	52.8646	40.1496
983.036	49.3431	53.6667	51.7461	39.1953
983.518	48.4039	53.3267	50.618	38.2448
984	47.4525	52.9763	49.4822	37.3016
984.482	46.4901	52.6159	48.3409	36.3689
984.964	45.5176	52.2463	47.1959	35.4484
985.447	44.5349	51.8681	46.0489	34.5401
985.929	43.5418	51.4822	44.9016	33.6434
986.411	42.5391	51.0897	43.7564	32.7578
986.893	41.5288	50.6918	42.6161	31.885
987.375	40.515	50.2899	41.4841	31.0278
987.857	39.5027	49.8856	40.3644	30.1906
988.339	38.4971	49.4808	39.2607	29.3767
988.821	37.5026	49.0772	38.1765	28.5882
989.303	36.5226	48.6766	37.1148	27.8253
989.785	35.5604	48.2807	36.0789	27.0876
990.268	34.62	47.8913	35.0722	26.376
990.75	33.707	47.5095	34.0984	25.6931
991.232	32.828	47.1365	33.1615	25.0432
991.714	31.9899	46.7731	32.2654	24.4305
992.196	31.1982	46.4195	31.4135	23.8579
992.678	30.4562	46.076	30.6086	23.3254
993.16	29.7651	45.7422	29.8525	22.8309
993.643	29.1252	45.4174	29.1469	22.3712
994.125	28.5365	45.1009	28.493	21.9444
994.607	28.0003	44.7914	27.8917	21.5502
995.089	27.5184	44.4878	27.3436	21.1903
995.571	27.0919	44.1884	26.8487	20.866
996.053	26.7209	43.8918	26.406	20.5769
996.535	26.4028	43.5962	26.0135	20.3203
997.017	26.1337	43.3003	25.6685	20.0912
997.499	25.9088	43.0025	25.3679	19.8849
997.981	25.7239	42.7017	25.1086	19.6981
998.464	25.5762	42.3969	24.8874	19.5302
998.946	25.4639	42.0872	24.7015	19.3827
999.428	25.3852	41.7721	24.5477	19.2571
999.91	25.3369	41.4511	24.4226	19.1533
1000.39	25.3144	41.1235	24.3226	19.0688
1000.87	25.312	40.7892	24.2438	18.9992
1001.36	25.3241	40.4479	24.1825	18.9406
1001.84	25.3463	40.0995	24.1353	18.8905
1002.32	25.3762	39.7442	24.0993	18.849
1002.8	25.4124	39.3822	24.0719	18.8177
1003.28	25.4532	39.014	24.0505	18.7972
1003.77	25.4958	38.64	24.0319	18.7859
1004.25	25.5352	38.2608	24.0128	18.779
1004.73	25.5654	37.877	23.9891	18.7694
1005.21	25.5803	37.4894	23.9566	18.7503
1005.7	25.5753	37.0991	23.9113	18.7171
1006.18	25.5479	36.7072	23.8495	18.6682
1006.66	25.4967	36.3149	23.7676	18.6049
1007.14	25.4207	35.9235	23.6623	18.5284
1007.62	25.3175	35.534	23.5299	18.4384
1008.11	25.183	35.1476	23.3673	18.3317
1008.59	25.0122	34.7649	23.1716	18.2031
1009.07	24.8001	34.3868	22.9406	18.0475
1009.55	24.5445	34.0141	22.6737	17.8625
1010.03	24.2459	33.6474	22.3713	17.6496
1010.52	23.9082	33.2871	22.0352	17.4136
1011	23.5363	32.9337	21.6679	17.1604
1011.48	23.1345	32.5869	21.2722	16.8941
1011.96	22.7053	32.2466	20.8513	16.6161
1012.45	22.2494	31.912	20.4085	16.3254
1012.93	21.767	31.5827	19.9475	16.0205
1013.41	21.2608	31.2581	19.4724	15.7026
1013.89	20.7368	30.9375	18.9879	15.3766
1014.37	20.2041	30.6206	18.4985	15.0503
1014.86	19.6719	30.3069	18.0087	14.7305
1015.34	19.1473	29.9958	17.5221	14.4211
1015.82	18.633	29.6868	17.0415	14.121
1016.3	18.1274	29.3796	16.5691	13.8262
1016.78	17.6274	29.0738	16.1069	13.5322
1017.27	17.1314	28.7694	15.6567	13.2387
1017.75	16.6421	28.4667	15.2204	12.9504
1018.23	16.1658	28.1659	14.7998	12.6754
1018.71	15.7093	27.8672	14.3964	12.421
1019.2	15.2764	27.5707	14.0112	12.1898
1019.68	14.8659	27.2766	13.6445	11.9783
1020.16	14.4725	26.9847	13.2963	11.7789
1020.64	14.0905	26.6955	12.9667	11.5838
1021.12	13.7176	26.409	12.6561	11.3897
1021.61	13.3574	26.1258	12.365	11.2003
1022.09	13.0175	25.8462	12.0941	11.0229
1022.57	12.7054	25.5707	11.8442	10.865
1023.05	12.4245	25.2992	11.6153	10.7297
1023.53	12.1733	25.0315	11.4076	10.6146
1024.02	11.9462	24.7675	11.2207	10.5138
1024.5	11.738	24.5071	11.0545	10.4217
1024.98	11.5472	24.2503	10.909	10.3366
1025.46	11.3776	23.9973	10.7848	10.2622
1025.94	11.2354	23.7485	10.6822	10.2045
1026.43	11.1256	23.5041	10.6015	10.1678
1026.91	11.0492	23.2643	10.5427	10.1518
1027.39	11.0025	23.0292	10.505	10.1515
1027.87	10.9792	22.7988	10.4878	10.159
1028.36	10.9739	22.5732	10.4904	10.1684
1028.84	10.9851	22.3527	10.5121	10.1791
1029.32	11.0158	22.1376	10.5526	10.1958
1029.8	11.0708	21.9281	10.6113	10.225
1030.28	11.1524	21.7243	10.6877	10.2706
1030.77	11.2587	21.5262	10.7804	10.331
1031.25	11.3833	21.3332	10.8881	10.3999
1031.73	11.518	21.1452	11.0089	10.4694
1032.21	11.6572	20.9619	11.1413	10.5341
1032.69	11.8008	20.783	11.2837	10.5952
1033.18	11.9531	20.6088	11.4351	10.6588
1033.66	12.1196	20.4391	11.5944	10.7322
1034.14	12.3021	20.274	11.7604	10.8192
1034.62	12.4972	20.1132	11.9315	10.9183
1035.1	12.697	19.9565	12.106	11.0234
1035.59	12.8926	19.8035	12.2822	11.1274
1036.07	13.0785	19.6543	12.4586	11.2265
1036.55	13.2553	19.5091	12.6343	11.3225
1037.03	13.4276	19.3684	12.8088	11.4213
1037.52	13.6011	19.2328	12.9821	11.529
1038	13.778	19.1028	13.1538	11.6479
1038.48	13.956	18.9786	13.3237	11.7748
1038.96	14.1293	18.8605	13.4912	11.9022
1039.44	14.2921	18.7487	13.6558	12.0219
1039.93	14.4416	18.6434	13.8171	12.1292
1040.41	14.5803	18.545	13.9753	12.2258
1040.89	14.714	18.4541	14.1309	12.3178
1041.37	14.8481	18.371	14.2845	12.4122
1041.85	14.9855	18.2959	14.4363	12.5126
1042.34	15.1251	18.2289	14.5863	12.6183
1042.82	15.2625	18.1696	14.7342	12.7246
1043.3	15.3936	18.1179	14.8796	12.8265
1043.78	15.5165	18.0735	15.022	12.9218
1044.27	15.6337	18.0364	15.1616	13.013
1044.75	15.7499	18.0068	15.2987	13.106
1045.23	15.8697	17.9844	15.4336	13.2064
1045.71	15.995	17.9691	15.5662	13.3166
1046.19	16.1237	17.9602	15.6964	13.4348
1046.67	16.2509	17.9571	15.8233	13.5556
1047.16	16.3712	17.9591	15.9464	13.6732
1047.64	16.482	17.9654	16.0652	13.7842
1048.12	16.5842	17.9756	16.1796	13.8895
1048.6	16.6816	17.9894	16.2902	13.9929
1049.09	16.7785	18.0062	16.3975	14.0984
1049.57	16.8769	18.0256	16.502	14.2072
1050.05	16.9753	18.0465	16.6038	14.3167
1050.53	17.07	18.0681	16.7031	14.4217
1051.01	17.1572	18.0894	16.8001	14.5176
1051.5	17.2359	18.1098	16.8957	14.6029
1051.98	17.3088	18.1288	16.9913	14.6812
1052.46	17.3816	18.1462	17.0888	14.7591
1052.94	17.4599	18.1618	17.1905	14.8432
1053.42	17.5477	18.1753	17.2989	14.9377
1053.91	17.6456	18.1864	17.4161	15.0426
1054.39	17.7523	18.1946	17.544	15.1556
1054.87	17.8663	18.1996	17.6849	15.2744
1055.35	17.9885	18.2012	17.8409	15.3989
1055.84	18.123	18.1996	18.0148	15.5328
1056.32	18.276	18.195	18.2094	15.6813
1056.8	18.4533	18.1875	18.4273	15.8493
1057.28	18.659	18.1775	18.671	16.039
1057.76	18.8941	18.1647	18.9421	16.2495
1058.25	19.1579	18.1493	19.2419	16.4773
1058.73	19.4499	18.131	19.5714	16.7199
1059.21	19.7711	18.1103	19.9317	16.9769
1059.69	20.125	18.0874	20.3238	17.2514
1060.17	20.5162	18.0627	20.7487	17.5483
1060.66	20.948	18.0367	21.207	17.8713
1061.14	21.4211	18.0095	21.6985	18.2215
1061.62	21.9329	17.9809	22.2218	18.5962
1062.1	22.4783	17.9509	22.7745	18.9906
1062.59	23.0517	17.919	23.3529	19.3995
1063.07	23.6478	17.8854	23.9526	19.8191
1063.55	24.2627	17.8501	24.5679	20.2471
1064.03	24.8917	17.8132	25.1916	20.6817
1064.51	25.5275	17.7748	25.815	21.1189
1065	26.1592	17.7348	26.4273	21.5512
1065.48	26.7714	17.6928	27.0156	21.9675
1065.96	27.3464	17.6484	27.5656	22.3542
1066.44	27.8661	17.6012	28.062	22.6983
1066.92	28.3143	17.551	28.4901	22.9888
1067.41	28.6782	17.4979	28.8362	23.2185
1067.89	28.9482	17.4423	29.0888	23.3829
1068.37	29.1171	17.3846	29.2389	23.4791
1068.85	29.1799	17.3251	29.2805	23.5042
1069.34	29.1331	17.264	29.2111	23.4547
1069.82	28.976	17.2016	29.0316	23.3277
1070.3	28.712	17.1383	28.7474	23.1224
1070.78	28.3494	17.0747	28.3675	22.842
1071.26	27.9021	17.0117	27.9046	22.495
1071.74	27.3878	16.9504	27.3741	22.0943
1072.23	26.8263	16.8915	26.7929	21.6546
1072.71	26.2362	16.8359	26.1779	21.1902
1073.19	25.6335	16.7841	25.5454	20.7127
1073.67	25.0309	16.7364	24.9101	20.2308
1074.16	24.4388	16.6933	24.2856	19.7523
1074.64	23.8669	16.6553	23.6834	19.2855
1075.12	23.3249	16.623	23.1139	18.8402
1075.6	22.8223	16.5973	22.5856	18.427
1076.08	22.3674	16.5787	22.1052	18.0554
1076.57	21.9659	16.5674	21.6776	17.732
1077.05	21.6199	16.5635	21.3058	17.4591
1077.53	21.3291	16.567	20.9916	17.236
1078.01	21.0922	16.5778	20.7357	17.0603
1078.49	20.9081	16.5959	20.5383	16.9301
1078.98	20.7775	16.6216	20.3997	16.8452
1079.46	20.7022	16.655	20.3198	16.8065
1079.94	20.684	16.6964	20.2983	16.8147
1080.42	20.723	16.7454	20.3344	16.8683
1080.91	20.8175	16.8019	20.4268	16.9635
1081.39	20.9643	16.8652	20.5738	17.0947
1081.87	21.1601	16.9351	20.7733	17.2563
1082.35	21.4026	17.0113	21.0232	17.4443
1082.83	21.6913	17.0936	21.3217	17.6577
1083.32	22.0262	17.182	21.6667	17.8967
1083.8	22.4069	17.2762	22.0557	18.1611
1084.28	22.8303	17.3758	22.4853	18.4483
1084.76	23.2907	17.4801	22.9515	18.7532
1085.24	23.7805	17.5885	23.4494	19.0693
1085.73	24.2923	17.7003	23.9736	19.3907
1086.21	24.8199	17.8152	24.5187	19.7145
1086.69	25.3588	17.9331	25.0791	20.0405
1087.17	25.9055	18.0537	25.6491	20.3696
1087.65	26.4557	18.1768	26.223	20.702
1088.14	27.0034	18.302	26.7944	21.0353
1088.62	27.5409	18.4285	27.357	21.3646
1089.1	28.06	18.5558	27.9042	21.6844
1089.58	28.554	18.6833	28.43	21.9902
1090.07	29.0188	18.8106	28.9296	22.2805
1090.55	29.4526	18.9376	29.399	22.5564
1091.03	29.8551	19.0642	29.8354	22.8203
1091.51	30.226	19.1902	30.2366	23.0739
1091.99	30.5639	19.3155	30.6013	23.3168
1092.48	30.8667	19.4395	30.9283	23.547
1092.96	31.1327	19.5619	31.2173	23.7613
1093.44	31.3614	19.6823	31.4685	23.9577
1093.92	31.5545	19.8007	31.6834	24.1364
1094.4	31.7157	19.9171	31.8644	24.2996
1094.89	31.85	20.0318	32.0148	24.4506
1095.37	31.9617	20.145	32.1379	24.5924
1095.85	32.0544	20.2565	32.2372	24.7262
1096.33	32.1305	20.3665	32.3162	24.8519
1096.82	32.1919	20.4747	32.378	24.9683
1097.3	32.2408	20.5813	32.426	25.0748
1097.78	32.2804	20.6867	32.4637	25.1727
1098.26	32.3154	20.7911	32.495	25.2644
1098.74	32.3507	20.8952	32.5238	25.3536
1099.23	32.3906	20.9991	32.5535	25.4434
1099.71	32.438	21.103	32.5871	25.5351
1100.19	32.4941	21.2068	32.6269	25.6288
1100.67	32.5592	21.3103	32.6744	25.7238
1101.15	32.6332	21.4135	32.731	25.8197
1101.64	32.7171	21.5167	32.7979	25.9171
1102.12	32.8122	21.6201	32.8765	26.0183
1102.6	32.9209	21.724	32.9679	26.1255
1103.08	33.0445	21.8285	33.0729	26.2404
1103.57	33.1838	21.9336	33.1918	26.363
1104.05	33.3379	22.039	33.3244	26.4915
1104.53	33.5055	22.1446	33.4702	26.6235
1105.01	33.6853	22.2501	33.6286	26.7576
1105.49	33.8769	22.3557	33.7992	26.8936
1105.98	34.0808	22.4616	33.9821	27.0332
1106.46	34.2981	22.5681	34.1774	27.1785
1106.94	34.5294	22.6754	34.3852	27.3314
1107.42	34.7742	22.7836	34.6053	27.4921
1107.9	35.0311	22.8927	34.837	27.6592
1108.39	35.2982	23.0027	35.0793	27.8303
1108.87	35.5737	23.1138	35.331	28.0037
1109.35	35.857	23.2263	35.5913	28.1788
1109.83	36.1478	23.3407	35.8592	28.3561
1110.32	36.4463	23.4571	36.1337	28.537
1110.8	36.7517	23.5761	36.4136	28.7222
1111.28	37.0624	23.6975	36.6972	28.9112
1111.76	37.3754	23.8215	36.9824	29.1019
1112.24	37.6871	23.9478	37.2667	29.2918
1112.72	37.9944	24.0766	37.5479	29.4785
1113.21	38.2951	24.2079	37.8241	29.6608
1113.69	38.5877	24.3419	38.0939	29.8385
1114.17	38.8717	24.4785	38.3562	30.0122
1114.65	39.1459	24.6177	38.6101	30.1818
1115.14	39.4088	24.7591	38.8544	30.3462
1115.62	39.6582	24.9021	39.088	30.5034
1116.1	39.8916	25.0462	39.3097	30.6512
1116.58	40.1075	25.1909	39.5186	30.7882
1117.06	40.3055	25.3358	39.7143	30.9141
1117.55	40.4862	25.4808	39.8969	31.0303
1118.03	40.6512	25.6257	40.067	31.1386
1118.51	40.8019	25.7702	40.2252	31.2403
1118.99	40.9394	25.9139	40.3719	31.3359
1119.47	41.0642	26.0562	40.5078	31.4245
1119.96	41.1768	26.1968	40.6334	31.5053
1120.44	41.2781	26.3352	40.7496	31.5781
1120.92	41.3703	26.4714	40.858	31.6438
1121.4	41.4561	26.6052	40.9605	31.7045
1121.88	41.5388	26.7365	41.0597	31.7633
1122.37	41.6214	26.865	41.1579	31.8225
1122.85	41.7062	26.9905	41.2573	31.8835
1123.33	41.7947	27.1126	41.3597	31.9465
1123.81	41.8879	27.2311	41.4665	32.0112
1124.3	41.9872	27.3458	41.5792	32.0777
1124.78	42.0945	27.4569	41.6991	32.1466
1125.26	42.2119	27.5646	41.8277	32.2197
1125.74	42.3416	27.6693	41.9659	32.2985
1126.22	42.4852	27.7712	42.1143	32.3844
1126.71	42.6429	27.8705	42.2728	32.4772
1127.19	42.8137	27.9674	42.4404	32.5758
1127.67	42.9959	28.0622	42.6157	32.6783
1128.15	43.1872	28.1552	42.7968	32.7832
1128.63	43.3857	28.247	42.9819	32.8896
1129.12	43.5897	28.3383	43.1693	32.9971
1129.6	43.7974	28.4297	43.3567	33.1054
1130.08	44.0063	28.5216	43.5419	33.2135
1130.56	44.2132	28.6141	43.722	33.3188
1131.05	44.4141	28.7072	43.8933	33.4178
1131.53	44.6044	28.8009	44.0522	33.5064
1132.01	44.7799	28.895	44.1947	33.5808
1132.49	44.937	28.9894	44.3173	33.6384
1132.97	45.0728	29.0841	44.4166	33.6775
1133.46	45.1845	29.1789	44.4896	33.6975
1133.94	45.2695	29.2734	44.5333	33.6971
1134.42	45.3244	29.3672	44.5447	33.6746
1134.9	45.3458	29.4599	44.5208	33.6274
1135.38	45.3299	29.5511	44.459	33.5524
1135.87	45.2738	29.6403	44.3569	33.4472
1136.35	45.1752	29.7276	44.2133	33.3107
1136.83	45.0332	29.8127	44.0274	33.1431
1137.31	44.8473	29.8956	43.7992	32.9458
1137.8	44.6175	29.976	43.5291	32.7203
1138.28	44.3432	30.0538	43.2175	32.4678
1138.76	44.0236	30.1285	42.8651	32.1887
1139.24	43.658	30.2	42.4727	31.8834
1139.72	43.2463	30.2681	42.0415	31.5524
1140.21	42.7895	30.333	41.5735	31.1975
1140.69	42.2903	30.3946	41.0714	30.8215
1141.17	41.7522	30.4533	40.5382	30.4278
1141.65	41.1794	30.509	39.9772	30.0198
1142.13	40.5755	30.5616	39.3915	29.5996
1142.62	39.9435	30.611	38.7843	29.1682
1143.1	39.2861	30.6573	38.1584	28.726
1143.58	38.6056	30.7005	37.5171	28.2738
1144.06	37.9057	30.7409	36.8639	27.8138
1144.55	37.1905	30.7788	36.2026	27.3497
1145.03	36.4653	30.8146	35.5374	26.886
1145.51	35.7351	30.8484	34.8719	26.4266
1145.99	35.004	30.8804	34.2093	25.9742
1146.47	34.2747	30.9107	33.5523	25.5295
1146.96	33.5489	30.9392	32.9031	25.0922
1147.44	32.828	30.9658	32.264	24.6625
1147.92	32.1144	30.9909	31.6373	24.2417
1148.4	31.4117	31.0143	31.0256	23.8331
1148.88	30.7239	31.0362	30.4315	23.4407
1149.37	30.0553	31.0565	29.8574	23.068
1149.85	29.4088	31.0751	29.3057	22.7168
1150.33	28.7859	31.0919	28.7782	22.3873
1150.81	28.1874	31.1067	28.277	22.0786
1151.3	27.6144	31.1198	27.8041	21.7901
1151.78	27.0694	31.1315	27.3622	21.5231
1152.26	26.5565	31.142	26.9542	21.2801
1152.74	26.0804	31.1517	26.5829	21.0646
1153.22	25.6453	31.161	26.2512	20.8794
1153.7	25.2541	31.1701	25.9614	20.7257
1154.19	24.9083	31.1791	25.7155	20.6032
1154.67	24.6089	31.1885	25.5152	20.5114
1155.15	24.3571	31.1985	25.3625	20.4502
1155.63	24.1557	31.2098	25.2594	20.4212
1156.12	24.0083	31.2229	25.208	20.4273
1156.6	23.9189	31.2383	25.2106	20.4714
1157.08	23.8907	31.2563	25.269	20.5554
1157.56	23.9254	31.277	25.3849	20.6797
1158.04	24.0234	31.3007	25.5594	20.8435
1158.53	24.1848	31.3275	25.7935	21.0457
1159.01	24.41	31.3575	26.0886	21.2864
1159.49	24.7002	31.391	26.4456	21.5673
1159.97	25.0572	31.4283	26.866	21.8907
1160.45	25.4824	31.4695	27.3507	22.2587
1160.94	25.9757	31.5146	27.9002	22.6722
1161.42	26.5354	31.5635	28.5141	23.1296
1161.9	27.1581	31.6158	29.1916	23.6288
1162.38	27.8404	31.6714	29.9308	24.1671
1162.87	28.5788	31.7298	30.7298	24.7435
1163.35	29.3713	31.7907	31.5861	25.3583
1163.83	30.2156	31.8538	32.4967	26.0123
1164.31	31.1088	31.9185	33.4578	26.7057
1164.79	32.0461	31.9842	34.4648	27.4368
1165.28	33.0209	32.05	35.5123	28.2018
1165.76	34.0258	32.1153	36.5941	28.9958
1166.24	35.0532	32.1794	37.7036	29.8141
1166.72	36.097	32.2416	38.8344	30.653
1167.2	37.1527	32.3018	39.9802	31.5102
1167.69	38.2162	32.3598	41.1351	32.384
1168.17	39.2836	32.4154	42.2934	33.272
1168.65	40.3499	32.4689	43.4492	34.1707
1169.13	41.4096	32.5201	44.5967	35.0752
1169.62	42.4571	32.5696	45.7304	35.9806
1170.1	43.4879	32.6178	46.8451	36.8827
1170.58	44.4989	32.6654	47.9369	37.7784
1171.06	45.4887	32.7134	49.0024	38.666
1171.54	46.4562	32.7629	50.0392	39.5446
1172.03	47.4008	32.8147	51.0455	40.4127
1172.51	48.3212	32.8696	52.0201	41.2681
1172.99	49.216	32.9282	52.9619	42.1081
1173.47	50.0838	32.991	53.8702	42.9299
1173.95	50.9239	33.0584	54.7449	43.7315
1174.44	51.7365	33.1305	55.5865	44.512
1174.92	52.5227	33.2078	56.396	45.2716
1175.4	53.2839	33.2901	57.175	46.0109
1175.88	54.0214	33.3773	57.9251	46.7305
1176.37	54.7358	33.469	58.6477	47.4303
1176.85	55.4274	33.5648	59.3441	48.1097
1177.33	56.096	33.6639	60.0152	48.7677
1177.81	56.7418	33.7659	60.6618	49.4038
1178.29	57.3653	33.87	61.2845	50.0178
1178.78	57.9672	33.9759	61.884	50.6102
1179.26	58.5489	34.0828	62.4611	51.1817
1179.74	59.1111	34.1904	63.0163	51.7331
1180.22	59.6545	34.2978	63.5499	52.2646
1180.7	60.1793	34.4044	64.062	52.776
1181.19	60.6853	34.5093	64.5526	53.2669
1181.67	61.1725	34.612	65.0215	53.7369
1182.15	61.641	34.712	65.469	54.186
1182.63	62.0913	34.8087	65.8956	54.6146
1183.11	62.5238	34.9017	66.302	55.023
1183.6	62.939	34.9906	66.6889	55.4118
1184.08	63.3371	35.0747	67.0568	55.7807
1184.56	63.7177	35.1535	67.4057	56.1295
1185.04	64.0802	35.2265	67.7354	56.4574
1185.53	64.4241	35.2933	68.0453	56.7641
1186.01	64.749	35.3537	68.3349	57.0494
1186.49	65.0548	35.4077	68.604	57.3138
1186.97	65.3416	35.4556	68.8522	57.5577
1187.45	65.6095	35.4973	69.0796	57.7816
1187.94	65.8583	35.5332	69.286	57.9857
1188.42	66.0874	35.5633	69.4713	58.1697
1188.9	66.2964	35.5879	69.6352	58.3332
1189.38	66.4845	35.6071	69.7778	58.4755
1189.86	66.6516	35.6212	69.8993	58.5968
1190.35	66.7977	35.6305	70.0003	58.6975
1190.83	66.9235	35.6354	70.0818	58.7783
1191.31	67.0294	35.6359	70.1449	58.8403
1191.79	67.1162	35.6323	70.1908	58.8844
1192.28	67.1845	35.6246	70.22	58.9113
1192.76	67.2349	35.6127	70.2331	58.9215
1193.24	67.2681	35.597	70.2307	58.9155
1193.72	67.2853	35.5775	70.2132	58.8943
1194.2	67.2881	35.5545	70.1815	58.8594
1194.68	67.2782	35.5286	70.1369	58.8124
1195.17	67.2578	35.4999	70.0809	58.7553
1195.65	67.2286	35.4689	70.0149	58.6897
1196.13	67.1925	35.4359	69.9407	58.6174
1196.61	67.1509	35.4012	69.8597	58.5396
1197.1	67.1054	35.3656	69.7737	58.4577
1197.58	67.0577	35.3294	69.6847	58.3735
1198.06	67.0096	35.2934	69.5949	58.2889
1198.54	66.9634	35.2582	69.5068	58.2059
1199.02	66.921	35.2243	69.4227	58.1266
1199.51	66.8843	35.192	69.3447	58.0526
1199.99	66.855	35.1615	69.2746	57.9854
1200.47	66.8341	35.1327	69.2136	57.9257
1200.95	66.8228	35.1056	69.1628	57.8745
1201.43	66.8223	35.0803	69.1233	57.8328
1201.92	66.8339	35.0567	69.0961	57.8019
1202.4	66.8591	35.0347	69.0824	57.7833
1202.88	66.8992	35.0141	69.0833	57.7783
1203.36	66.9552	34.9947	69.0997	57.7876
1203.85	67.0277	34.9761	69.1323	57.8118
1204.33	67.1171	34.9579	69.1813	57.8509
1204.81	67.2234	34.9398	69.2471	57.9048
1205.29	67.3468	34.9216	69.33	57.9734
1205.77	67.4875	34.9032	69.4303	58.057
1206.26	67.6455	34.8843	69.5485	58.1558
1206.74	67.8207	34.8648	69.6844	58.2698
1207.22	68.0125	34.8443	69.8377	58.3987
1207.7	68.22	34.8225	70.0074	58.5416
1208.18	68.4417	34.7991	70.1917	58.6974
1208.67	68.6762	34.7738	70.3888	58.8646
1209.15	68.9218	34.7464	70.5966	59.0421
1209.63	69.1773	34.7168	70.8132	59.2287
1210.11	69.4412	34.6848	71.0367	59.4234
1210.6	69.712	34.6502	71.2652	59.6249
1211.08	69.9879	34.6129	71.4969	59.8316
1211.56	70.2669	34.5725	71.7298	60.0416
1212.04	70.5468	34.5289	71.9617	60.2525
1212.52	70.8252	34.4817	72.1908	60.4621
1213.01	71.1002	34.4311	72.4153	60.6683
1213.49	71.37	34.3769	72.634	60.8695
1213.97	71.633	34.3193	72.8456	61.0641
1214.45	71.8877	34.2581	73.049	61.2508
1214.93	72.1326	34.1934	73.243	61.428
1215.42	72.3659	34.1249	73.4263	61.5941
1215.9	72.5862	34.0527	73.5972	61.7473
1216.38	72.7919	33.9767	73.7541	61.886
1216.86	72.9821	33.8971	73.896	62.0093
1217.35	73.1559	33.8142	74.0217	62.1163
1217.83	73.3131	33.7284	74.131	62.2066
1218.31	73.4534	33.6399	74.2234	62.2801
1218.79	73.5765	33.5491	74.2989	62.3364
1219.27	73.6824	33.4563	74.3574	62.3751
1219.76	73.7707	33.3618	74.3989	62.3957
1220.24	73.8414	33.2662	74.4237	62.398
1220.72	73.8948	33.1701	74.4322	62.3825
1221.2	73.9313	33.074	74.4253	62.3497
1221.68	73.9517	32.9788	74.404	62.3008
1222.17	73.957	32.8851	74.3695	62.2368
1222.65	73.9477	32.7936	74.3227	62.1587
1223.13	73.9246	32.7047	74.2641	62.0674
1223.61	73.8881	32.6191	74.1939	61.9635
1224.09	73.8388	32.5373	74.1125	61.8476
1224.58	73.7773	32.46	74.02	61.7209
1225.06	73.7046	32.3878	73.917	61.5846
1225.54	73.6217	32.3213	73.8045	61.4403
1226.02	73.5298	32.261	73.6834	61.2895
1226.51	73.4297	32.2072	73.5547	61.1336
1226.99	73.3223	32.1601	73.4193	60.9735
1227.47	73.2082	32.12	73.2782	60.81
1227.95	73.0881	32.0871	73.1322	60.6439
1228.43	72.9628	32.0616	72.9825	60.4759
1228.91	72.8333	32.0438	72.8302	60.3073
1229.4	72.7009	32.0337	72.6768	60.1391
1229.88	72.5666	32.0315	72.5234	59.9725
1230.36	72.4315	32.0368	72.3708	59.8081
1230.84	72.2962	32.0493	72.2193	59.6463
1231.33	72.1612	32.0686	72.0691	59.4873
1231.81	72.0271	32.0942	71.9202	59.3312
1232.29	71.8943	32.126	71.7726	59.1783
1232.77	71.7636	32.1634	71.6269	59.0296
1233.26	71.6358	32.2061	71.4836	58.8856
1233.74	71.5116	32.2537	71.3435	58.7473
1234.22	71.3915	32.3055	71.2073	58.6151
1234.7	71.2758	32.3609	71.0755	58.4892
1235.18	71.1644	32.4192	70.9484	58.3692
1235.66	71.0575	32.48	70.8265	58.2552
1236.15	70.955	32.5428	70.7101	58.1473
1236.63	70.8572	32.6073	70.5998	58.0459
1237.11	70.7647	32.6732	70.4962	57.9516
1237.59	70.6776	32.7399	70.3996	57.8649
1238.08	70.5963	32.8072	70.3102	57.786
1238.56	70.5207	32.8746	70.2275	57.7147
1239.04	70.4505	32.9416	70.151	57.6508
1239.52	70.3856	33.0081	70.0799	57.594
1240	70.3261	33.0738	70.0137	57.5442
1240.49	70.2722	33.1386	69.9521	57.5015
1240.97	70.2241	33.2025	69.8949	57.4664
1241.45	70.1821	33.2653	69.842	57.4389
1241.93	70.1461	33.327	69.7935	57.419
1242.41	70.1158	33.3872	69.7491	57.4061
1242.9	70.0908	33.4461	69.7085	57.3996
1243.38	70.0703	33.5037	69.6715	57.399
1243.86	70.054	33.5602	69.6379	57.4039
1244.34	70.0417	33.6157	69.608	57.4145
1244.83	70.0332	33.6706	69.5819	57.4308
1245.31	70.0285	33.7249	69.5596	57.4529
1245.79	70.0271	33.7787	69.5409	57.4806
1246.27	70.0286	33.8318	69.5252	57.5131
1246.75	70.0322	33.8844	69.5118	57.5498
1247.24	70.0374	33.9365	69.4999	57.5898
1247.72	70.0439	33.9883	69.489	57.6329
1248.2	70.0516	34.04	69.4791	57.679
1248.68	70.0605	34.0916	69.4701	57.7279
1249.16	70.0707	34.1431	69.4622	57.7798
1249.65	70.0822	34.1944	69.4556	57.8341
1250.13	70.0946	34.2452	69.45	57.8903
1250.61	70.1077	34.2955	69.4455	57.9476
1251.09	70.1212	34.3452	69.4418	58.0053
1251.58	70.1352	34.3943	69.4392	58.0633
1252.06	70.1498	34.4428	69.4378	58.1215
1252.54	70.1653	34.4907	69.4382	58.18
1253.02	70.182	34.538	69.4405	58.2388
1253.5	70.1997	34.5846	69.4447	58.2978
1253.98	70.2184	34.6302	69.4506	58.3563
1254.47	70.2375	34.6747	69.4575	58.4139
1254.95	70.2568	34.7181	69.4651	58.4702
1255.43	70.2762	34.7604	69.4728	58.5251
1255.91	70.2958	34.8013	69.4805	58.579
1256.4	70.3159	34.8408	69.4883	58.6323
1256.88	70.337	34.8788	69.4963	58.6856
1257.36	70.359	34.9148	69.5046	58.7388
1257.84	70.3821	34.9487	69.5132	58.7919
1258.33	70.4061	34.9803	69.522	58.8444
1258.81	70.4313	35.0095	69.531	58.8964
1259.29	70.4579	35.0365	69.5407	58.9478
1259.77	70.4864	35.0614	69.5516	58.9991
1260.25	70.5177	35.0844	69.5643	59.0508
1260.73	70.5522	35.1056	69.5791	59.1032
1261.22	70.5903	35.1252	69.5965	59.1563
1261.7	70.6322	35.1431	69.6162	59.2099
1262.18	70.6779	35.1596	69.6382	59.2638
1262.66	70.7274	35.175	69.6625	59.3177
1263.15	70.781	35.1895	69.6896	59.3718
1263.63	70.8388	35.2034	69.7201	59.4264
1264.11	70.9013	35.2171	69.7549	59.4818
1264.59	70.9687	35.2308	69.7952	59.5383
1265.07	71.0408	35.2446	69.8417	59.5957
1265.56	71.1173	35.2584	69.8948	59.6536
1266.04	71.1975	35.2725	69.9548	59.7113
1266.52	71.2809	35.2868	70.0217	59.7684
1267	71.3672	35.3014	70.0956	59.8249
1267.48	71.456	35.3164	70.1763	59.8809
1267.97	71.5471	35.3318	70.264	59.9366
1268.45	71.6404	35.3474	70.3582	59.9923
1268.93	71.7354	35.3633	70.4586	60.0478
1269.41	71.8315	35.3793	70.5643	60.1027
1269.89	71.9282	35.3955	70.6746	60.1564
1270.38	72.0247	35.4122	70.7889	60.2087
1270.86	72.1207	35.4295	70.9064	60.2594
1271.34	72.2161	35.4477	71.0269	60.3087
1271.82	72.3106	35.4669	71.15	60.3569
1272.31	72.4041	35.4872	71.2752	60.404
1272.79	72.4959	35.5085	71.4018	60.4499
1273.27	72.5855	35.5308	71.5287	60.4942
1273.75	72.6722	35.5541	71.6548	60.5365
1274.23	72.7553	35.5784	71.7787	60.5763
1274.72	72.8345	35.6041	71.8996	60.6135
1275.2	72.9095	35.6313	72.0163	60.6482
1275.68	72.9804	35.6602	72.128	60.6804
1276.16	73.0467	35.6909	72.2337	60.7098
1276.64	73.1083	35.7233	72.332	60.7359
1277.13	73.1643	35.7574	72.4216	60.7578
1277.61	73.2143	35.7933	72.5011	60.7748
1278.09	73.2575	35.8312	72.5693	60.786
1278.57	73.2938	35.871	72.6253	60.7912
1279.06	73.3228	35.913	72.6689	60.7901
1279.54	73.3445	35.9573	72.7	60.7828
1280.02	73.3588	36.004	72.7191	60.7691
1280.5	73.3655	36.053	72.7262	60.7483
1280.98	73.364	36.1043	72.7215	60.7196
1281.47	73.3537	36.158	72.7052	60.6821
1281.95	73.3341	36.2143	72.6773	60.6352
1282.43	73.3048	36.2731	72.638	60.5782
1282.91	73.2655	36.3345	72.5873	60.5111
1283.39	73.2158	36.3985	72.5253	60.434
1283.88	73.1555	36.4647	72.4517	60.3468
1284.36	73.0838	36.5328	72.366	60.2491
1284.84	73	36.6026	72.2674	60.1406
1285.32	72.9032	36.6737	72.1551	60.0207
1285.81	72.7929	36.7459	72.0289	59.8893
1286.29	72.6688	36.819	71.8885	59.7464
1286.77	72.531	36.8927	71.7346	59.5926
1287.25	72.3798	36.9667	71.5679	59.4286
1287.73	72.2158	37.0407	71.3893	59.255
1288.22	72.0395	37.1142	71.1997	59.0725
1288.7	71.8517	37.1868	70.9997	58.8814
1289.18	71.6531	37.258	70.7905	58.682
1289.66	71.4449	37.3276	70.5729	58.4752
1290.14	71.2286	37.3954	70.3484	58.2622
1290.63	71.0062	37.4612	70.1188	58.0444
1291.11	70.7798	37.5247	69.8858	57.8235
1291.59	70.5514	37.5854	69.6511	57.6011
1292.07	70.3227	37.6432	69.4161	57.3785
1292.56	70.0954	37.6976	69.1821	57.1569
1293.04	69.8706	37.7485	68.9503	56.9371
1293.52	69.6496	37.7958	68.7218	56.7203
1294	69.4338	37.8394	68.4981	56.5081
1294.48	69.2243	37.8792	68.2807	56.3022
1294.96	69.0224	37.9151	68.0714	56.1043
1295.45	68.829	37.947	67.8715	55.9159
1295.93	68.6448	37.9745	67.6825	55.7381
1296.41	68.4701	37.9977	67.5052	55.5716
1296.89	68.3051	38.0164	67.3405	55.4172
1297.38	68.1502	38.0309	67.1893	55.2753
1297.86	68.006	38.0412	67.0525	55.1469
1298.34	67.8734	38.0476	66.9312	55.0331
1298.82	67.7535	38.0504	66.8262	54.9348
1299.3	67.647	38.0495	66.7383	54.8524
1299.79	67.555	38.0451	66.6677	54.7859
1300.27	67.4777	38.0373	66.6145	54.7349
1300.75	67.4157	38.0263	66.5788	54.6986
1301.23	67.3696	38.0124	66.5605	54.6765
1301.71	67.3398	37.9956	66.5598	54.668
1302.2	67.3271	37.9763	66.5769	54.673
1302.68	67.3319	37.9545	66.6115	54.691
1303.16	67.3543	37.9301	66.6632	54.7211
1303.64	67.3937	37.9029	66.7308	54.762
1304.13	67.4493	37.873	66.8128	54.812
1304.61	67.5199	37.8403	66.9074	54.8693
1305.09	67.6042	37.8049	67.0126	54.9321
1305.57	67.701	37.767	67.127	54.999
1306.05	67.8089	37.7268	67.2489	55.0686
1306.54	67.9267	37.6845	67.3766	55.1398
1307.02	68.0523	37.6402	67.5084	55.2108
1307.5	68.1836	37.5939	67.6421	55.2799
1307.98	68.3181	37.5457	67.7753	55.3448
1308.46	68.453	37.4956	67.9053	55.4035
1308.95	68.5858	37.4437	68.0299	55.4543
1309.43	68.7141	37.3901	68.147	55.4959
1309.91	68.8358	37.3347	68.2551	55.5275
1310.39	68.9489	37.2775	68.3528	55.5483
[truncated: 5,579 more rows]
